# Supplementary material for: An efficient approach to pyrazolo[5,1-a]isoquinolin-2-amines via a silver(i)-catalyzed three-component reaction of 2-alkynylbenzaldehyde, sulfonohydrazide, and nitrile
Source: Royal Society of Chemistry journal article supplement (doi:10.1039/c1ob05917c), 2011-01-01

# An efficient approach to *H*-pyrazolo[5,1-*a*]isoquinolin-2-amines via a silver(I)-catalyzed three-component reaction of 2-alkynylbenzaldehyde, sulfonohydrazide, and nitrile

Xingxin Yu,<sup>a</sup> Qin Yang,<sup>b</sup> Honglei Lou,<sup>a</sup> Yiyuan Peng<sup>\*,b</sup> and Jie Wu<sup>\*,a</sup>

<sup>a</sup> Department of Chemistry, Fudan University, 220 Handan Road, Shanghai 200433, China. Fax: 86 21 6564 1740;  
Tel: 86 21 6510 2412; E-mail: jie\_wu@fudan.edu.cn

<sup>b</sup> Key Laboratory of Functional Small Organic Molecules, Ministry of Education and College of Chemistry &  
Chemical Engineering, Jiangxi Normal University, Nanchang, Jiangxi 330022, China

E-mail: jie\_wu@fudan.edu.cn

## Supporting Information

1. General experimental method (S2)
2. Experimental procedure for the synthesis of compounds **4** (S2)
3. Characterization data of compounds **4** (S3-S9)
4. <sup>1</sup>H & <sup>13</sup>C NMR spectra of compound **4** (S10-S45)

**General Experimental Method:**

All reactions were performed in test tubes in the air. Flash column chromatography was performed using silica gel (60-Å pore size, 32–63 μm, standard grade). Analytical thin-layer chromatography was performed using glass plates pre-coated with 0.25 mm 230–400 mesh silica gel impregnated with a fluorescent indicator (254 nm). Thin layer chromatography plates were visualized by exposure to ultraviolet light. Organic solutions were concentrated at ~20 Torr (house vacuum) at 25–35 °C. Solvents were re-distilled prior to use in the reactions. Other commercial reagents were used as received. 2-Alkynylbenzaldehyde **1** was synthesized via Sonogashira coupling according to the literature report. Chemical shifts (δ) are reported in parts per million (ppm) relative solvent signals.

**Experimental procedure for the synthesis of *H*-pyrazolo[5,1-*a*]isoquinolin-2-amines via AgOTf-catalyzed three-component reaction of 2-alkynylbenzaldehyde, sulfonylhydrazide, and nitrile.**

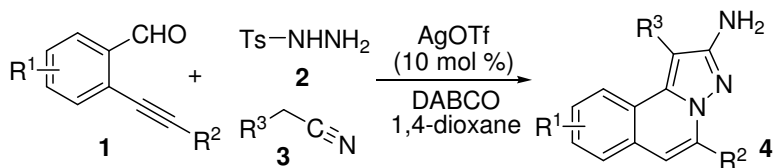

A mixture of 2-alkynylbenzaldehyde **1** (0.3 mmol, 1.0 equiv), AgOTf (7.7 mg, 10 mol %), and sulfonylhydrazide **2** (0.3 mmol, 1.0 equiv) in 1,4-dioxane (1.0 mL) was stirred at 70 °C vigorously for 1 hour. Then nitrile **3** (0.6 mmol, 2.0 equiv) and DABCO (0.6 mmol, 2.0 equiv) were added. After completion of the reaction as indicated by TLC, the reaction mixture was quenched with water (5.0 mL) and diluted with ethyl acetate (5.0 mL). The organic layer was washed with brine, dried over Na<sub>2</sub>SO<sub>4</sub>, and concentrated under reduced pressure. The residue was purified by column chromatography on silica gel to provide the desired product **4**.

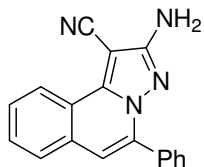

2-Amino-5-phenyl*H*-pyrazolo[5,1-*a*]isoquinoline-1-carbonitrile (**4a**).  $^1\text{H}$  NMR (400 MHz, DMSO- $d_6$ ): 6.32 (s, 2H), 7.29 (s, 1H), 7.47-7.53 (m, 3H), 7.65-7.70 (m, 2H), 7.77-7.79 (m, 2H), 7.91-7.93 (m, 1H), 8.46-8.48 (m, 1H);  $^{13}\text{C}$  NMR (100 MHz, DMSO- $d_6$ )  $\delta$  69.7, 112.6, 115.9, 120.7, 122.1, 127.7, 127.9, 128.1, 129.2, 129.4, 129.5, 130.1, 133.0, 137.2, 140.4, 159.2; HRMS calcd for  $\text{C}_{18}\text{H}_{12}\text{N}_4$  ( $\text{M}^++\text{H}$ ): 285.1140, found: 285.1147.

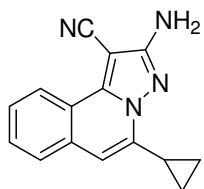

2-Amino-5-cyclopropyl*H*-pyrazolo[5,1-*a*]isoquinoline-1-carbonitrile (**4b**).  $^1\text{H}$  NMR (400 MHz, DMSO- $d_6$ ): 0.90-0.91 (m, 2H), 1.07-1.09 (m, 2H), 2.45-2.50 (m, 1H), 6.34 (s, 2H), 6.93 (s, 1H), 7.59-7.61 (m, 2H), 7.77-7.78 (m, 1H), 8.39-8.40 (m, 1H);  $^{13}\text{C}$  NMR (100 MHz, DMSO- $d_6$ )  $\delta$  7.4, 11.1, 69.4, 106.5, 116.0, 119.8, 122.0, 127.0, 127.1, 129.2, 130.2, 139.7, 140.2, 159.3; HRMS calcd for  $\text{C}_{15}\text{H}_{12}\text{N}_4$  ( $\text{M}^++\text{Na}$ ): 271.0960, found: 271.0977.

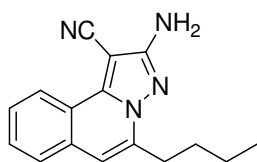

2-Amino-5-butyl*H*-pyrazolo[5,1-*a*]isoquinoline-1-carbonitrile (**4c**).  $^1\text{H}$  NMR (400 MHz, DMSO- $d_6$ ): 0.89 (t,  $J = 7.2$  Hz, 3H), 1.33-1.38 (m, 2H), 1.67-1.71 (m, 2H), 2.91-2.94 (m, 2H), 6.31 (s, 2H), 7.03 (s, 1H), 7.61-7.62 (m, 2H), 7.79-7.80 (m, 1H), 8.38-8.40 (m, 1H);  $^{13}\text{C}$  NMR (100 MHz, DMSO- $d_6$ )  $\delta$  13.7, 21.9, 28.3, 30.1, 69.2, 109.7, 116.0, 120.1, 122.0, 127.0, 127.1, 129.3, 130.0, 138.5, 139.7, 159.2; HRMS calcd for  $\text{C}_{16}\text{H}_{16}\text{N}_4$  ( $\text{M}^++\text{H}$ ): 265.1453, found: 265.1464.

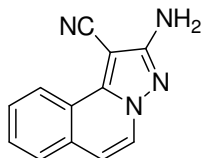

2-Amino*H*-pyrazolo[5,1-*a*]isoquinoline-1-carbonitrile (**4d**).  $^1\text{H}$  NMR (400 MHz, DMSO- $d_6$ ): 6.29 (s, 2H), 7.24 (d,  $J = 6.4$  Hz, 1H), 7.65-7.73 (m, 2H), 7.89-7.91 (m, 1H), 8.26 (d,  $J = 6.4$  Hz, 1H), 8.40 (d,  $J = 6.4$  Hz, 1H);  $^{13}\text{C}$  NMR (100 MHz, DMSO- $d_6$ )  $\delta$  69.0, 112.2, 115.9, 121.2, 122.2, 126.1, 127.7, 128.1, 129.4, 129.8, 139.3, 159.7; HRMS calcd for  $\text{C}_{12}\text{H}_8\text{N}_4$  ( $\text{M}^+ + \text{Na}$ ): 231.0647, found: 231.0660.

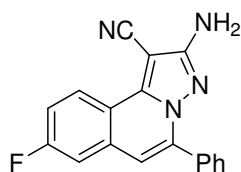

2-Amino-8-fluoro-5-phenyl*H*-pyrazolo[5,1-*a*]isoquinoline-1-carbonitrile (**4e**).  $^1\text{H}$  NMR (400 MHz, DMSO- $d_6$ ): 6.34 (s, 2H), 7.28 (s, 1H), 7.50-7.59 (m, 4H), 7.71-7.76 (m, 3H), 8.46 (dd,  $J = 8.4, 5.6$  Hz, 1H);  $^{13}\text{C}$  NMR (100 MHz, DMSO- $d_6$ )  $\delta$  69.7, 111.9, 112.1 (d,  $^2J_{\text{CF}} = 22$  Hz), 115.8, 116.9 (d,  $^2J_{\text{CF}} = 24$  Hz), 117.7, 125.1 (d,  $^3J_{\text{CF}} = 10$  Hz), 128.1, 129.4, 132.2 (d,  $^3J_{\text{CF}} = 10$  Hz), 132.7, 138.1, 140.2, 159.1, 161.9 (d,  $^1J_{\text{CF}} = 246$  Hz); HRMS calcd for  $\text{C}_{18}\text{H}_{11}\text{FN}_4$  ( $\text{M}^+ + \text{Na}$ ): 325.0865, found: 325.0861.

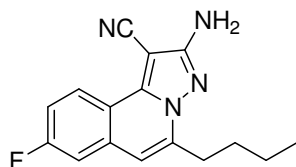

2-Amino-5-butyl-8-fluoro*H*-pyrazolo[5,1-*a*]isoquinoline-1-carbonitrile (**4f**).  $^1\text{H}$  NMR (400 MHz, DMSO- $d_6$ ): 0.92 (t,  $J = 7.2$  Hz, 3H), 1.34-1.43 (m, 2H), 1.69-1.72 (m, 2H), 2.92-2.96 (m, 2H), 6.35 (s, 2H), 7.07 (s, 1H), 7.51-7.55 (m, 1H), 7.65 (d,  $J = 9.6$  Hz, 1H), 8.39-8.42 (m, 1H);  $^{13}\text{C}$  NMR (100 MHz, DMSO- $d_6$ )  $\delta$  13.7, 21.9, 28.2, 30.1, 69.2, 109.0, 111.4 (d,  $^2J_{\text{CF}} = 22$  Hz), 115.8, 116.1 (d,  $^2J_{\text{CF}} = 24$  Hz), 117.0, 124.9 (d,  $^3J_{\text{CF}} = 10$  Hz), 132.2 (d,  $^3J_{\text{CF}} = 10$  Hz), 139.5, 139.6, 159.1, 161.9 (d,  $^1J_{\text{CF}} = 246$  Hz); HRMS calcd for  $\text{C}_{16}\text{H}_{15}\text{FN}_4$  ( $\text{M}^+ + \text{Na}$ ): 305.1178, found: 305.1189.

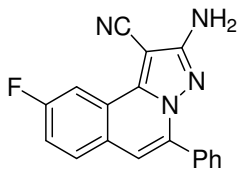

2-Amino-9-fluoro-5-phenyl*H*-pyrazolo[5,1-*a*]isoquinoline-1-carbonitrile (**4g**).  $^1\text{H}$  NMR (400 MHz,  $\text{DMSO-}d_6$ ): 6.34 (s, 2H), 7.30 (s, 1H), 7.49-7.55 (m, 4H), 7.75-7.76 (m, 2H), 7.98-8.00 (m, 2H);  $^{13}\text{C}$  NMR (100 MHz,  $\text{DMSO-}d_6$ )  $\delta$  69.9, 106.6 (d,  $^2J_{\text{CF}} = 24$  Hz), 112.2, 115.6, 118.5 (d,  $^2J_{\text{CF}} = 24$  Hz), 121.5 (d,  $^3J_{\text{CF}} = 10$  Hz), 127.0, 128.1, 129.2, 129.4, 130.8 (d,  $^3J_{\text{CF}} = 9$  Hz), 132.8, 136.6, 139.5, 159.1, 160.6 (d,  $^1J_{\text{CF}} = 245$  Hz); HRMS calcd for  $\text{C}_{18}\text{H}_{11}\text{FN}_4$  ( $\text{M}^+\text{+H}$ ): 303.1046, found: 303.1057.

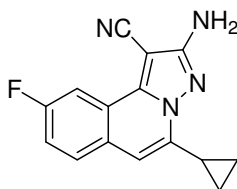

2-Amino-5-cyclopropyl-9-fluoro*H*-pyrazolo[5,1-*a*]isoquinoline-1-carbonitrile (**4h**).  $^1\text{H}$  NMR (400 MHz,  $\text{DMSO-}d_6$ ): 0.90-0.91 (m, 2H), 1.08-1.10 (m, 2H), 2.45-2.50 (m, 1H), 6.42 (s, 2H), 7.02 (s, 1H), 7.53-7.57 (m, 1H), 7.88-7.91 (m, 1H), 7.98 (d,  $J = 9.6$  Hz, 1H);  $^{13}\text{C}$  NMR (100 MHz,  $\text{DMSO-}d_6$ )  $\delta$  7.4, 11.1, 69.5, 106.3, 106.5 (d,  $^2J_{\text{CF}} = 24$  Hz), 115.8, 118.4 (d,  $^2J_{\text{CF}} = 24$  Hz), 120.6 (d,  $^3J_{\text{CF}} = 10$  Hz), 127.3, 130.2 (d,  $^3J_{\text{CF}} = 9$  Hz), 138.9, 139.8, 159.3, 160.1 (d,  $^1J_{\text{CF}} = 243$  Hz); HRMS calcd for  $\text{C}_{15}\text{H}_{11}\text{FN}_4$  ( $\text{M}^+\text{+Na}$ ): 289.0865, found: 289.0879.

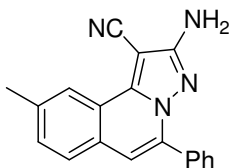

2-Amino-9-methyl-5-phenyl*H*-pyrazolo[5,1-*a*]isoquinoline-1-carbonitrile (**4i**).  $^1\text{H}$  NMR (400 MHz,  $\text{DMSO-}d_6$ ): 2.47 (s, 3H), 6.26 (s, 2H), 7.20 (s, 1H), 7.44-7.49 (m, 4H), 7.75-7.76 (m, 3H), 8.18 (s, 1H);  $^{13}\text{C}$  NMR (100 MHz,  $\text{DMSO-}d_6$ )  $\delta$  21.5, 69.4, 112.5, 116.0, 120.7, 121.2, 127.5, 127.9, 128.1, 129.1, 129.4, 131.0, 133.0, 136.3, 137.4, 139.9, 159.0; HRMS calcd for  $\text{C}_{19}\text{H}_{14}\text{N}_4$  ( $\text{M}^+\text{+H}$ ): 299.1297, found: 299.1321.

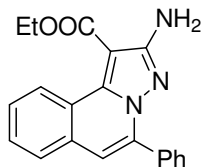

Ethyl 2-amino-5-phenyl*H*-pyrazolo[5,1-*a*]isoquinoline-1-carboxylate (**4j**).  $^1\text{H}$  NMR (400 MHz,  $\text{CDCl}_3$ ): 1.48 (t,  $J = 7.2$  Hz, 3H), 4.44-4.50 (m, 2H), 5.16 (s, 2H), 7.07 (s, 1H), 7.48-7.51 (m, 3H), 7.56-7.59 (m, 2H), 7.69-7.71 (m, 1H), 7.77-7.79 (m, 2H), 9.67-9.70 (m, 1H);  $^{13}\text{C}$  NMR (100 MHz,  $\text{CDCl}_3$ )  $\delta$  14.8, 60.6, 93.4, 114.3, 123.2, 127.1, 127.2, 127.7, 128.5, 129.2, 129.6, 129.9, 131.5, 134.1, 137.8, 140.5, 158.5, 164.9; HRMS calcd for  $\text{C}_{20}\text{H}_{17}\text{N}_3\text{O}_2$  ( $\text{M}^+\text{H}$ ): 332.1399, found: 332.1396.

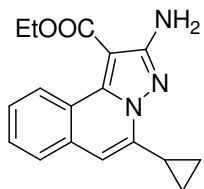

Ethyl 2-amino-5-cyclopropyl*H*-pyrazolo[5,1-*a*]isoquinoline-1-carboxylate (**4k**).  $^1\text{H}$  NMR (400 MHz,  $\text{CDCl}_3$ ): 0.86-0.90 (m, 2H), 1.14-1.19 (m, 2H), 1.48 (t,  $J = 7.2$  Hz, 3H), 2.56-2.63 (m, 1H), 4.44-4.50 (m, 2H), 5.29 (s, 2H), 6.17 (s, 1H), 7.50-7.62 (m, 3H), 9.62-9.64 (m, 1H);  $^{13}\text{C}$  NMR (100 MHz,  $\text{CDCl}_3$ )  $\delta$  7.3, 11.5, 14.5, 60.2, 92.9, 108.0, 122.1, 126.0, 126.2, 127.2, 128.6, 131.2, 139.9, 158.3, 164.6; HRMS calcd for  $\text{C}_{17}\text{H}_{17}\text{N}_3\text{O}_2$  ( $\text{M}^+\text{H}$ ): 296.1399, found: 296.1397.

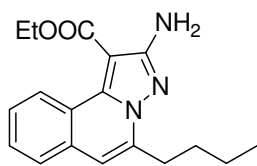

Ethyl 2-amino-5-butyl*H*-pyrazolo[5,1-*a*]isoquinoline-1-carboxylate (**4l**).  $^1\text{H}$  NMR (400 MHz,  $\text{CDCl}_3$ ): 0.99 (t,  $J = 7.2$  Hz, 3H), 1.48 (t,  $J = 7.2$  Hz, 3H), 1.43-1.53 (m, 2H), 1.78-1.85 (m, 2H), 3.03-3.07 (m, 2H), 4.44-4.49 (m, 2H), 5.22 (s, 2H), 6.89 (s, 1H), 7.50-7.57 (m, 2H), 7.63-7.65 (m, 1H), 9.62-9.64 (m, 1H);  $^{13}\text{C}$  NMR (100 MHz,  $\text{CDCl}_3$ )  $\delta$  14.3, 14.9, 22.8, 29.2, 31.2, 60.5, 93.1, 111.2, 122.7, 126.3, 126.6, 127.6, 128.9, 131.5, 139.0, 140.0, 158.5, 165.0; HRMS calcd for  $\text{C}_{18}\text{H}_{21}\text{N}_3\text{O}_2$  ( $\text{M}^+\text{H}$ ): 312.1712, found: 312.1721.

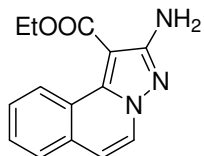

Ethyl 2-amino-5H-pyrazolo[5,1-a]isoquinoline-1-carboxylate (**4m**).  $^1\text{H}$  NMR (400 MHz,  $\text{CDCl}_3$ ): 1.48 (t,  $J = 7.2$  Hz, 3H), 4.44-4.49 (m, 2H), 5.23 (s, 2H), 7.05 (d,  $J = 7.2$  Hz, 1H), 7.56-7.61 (m, 2H), 7.67-7.70 (m, 1H), 8.01 (d,  $J = 7.2$  Hz, 1H), 9.65-9.68 (m, 1H);  $^{13}\text{C}$  NMR (100 MHz,  $\text{CDCl}_3$ )  $\delta$  14.9, 60.7, 93.2, 113.5, 123.9, 125.9, 127.3, 127.5, 128.0, 129.2, 131.3, 139.6, 159.2, 164.8; HRMS calcd for  $\text{C}_{14}\text{H}_{13}\text{N}_3\text{O}_2$  ( $\text{M}^+\text{+H}$ ): 256.1086, found: 256.1101.

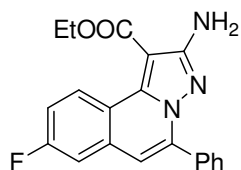

Ethyl 2-amino-8-fluoro-5-phenyl-5H-pyrazolo[5,1-a]isoquinoline-1-carboxylate (**4n**)  
 $^1\text{H}$  NMR (400 MHz,  $\text{DMSO}-d_6$ ): 1.37 (t,  $J = 6.8$  Hz, 3H), 4.35-4.40 (m, 2H), 6.05 (s, 2H), 7.33 (s, 1H), 7.45-7.55 (m, 4H), 7.70-7.76 (m, 3H), 9.68-9.72 (m, 1H);  $^{13}\text{C}$  NMR (100 MHz,  $\text{DMSO}-d_6$ )  $\delta$  14.3, 59.9, 92.0, 111.4 (d,  $^2J_{\text{CF}} = 20$  Hz), 112.7, 115.5 (d,  $^2J_{\text{CF}} = 24$  Hz), 118.9, 128.1, 129.2, 129.5, 129.8 (d,  $^3J_{\text{CF}} = 9$  Hz), 133.0 (d,  $^3J_{\text{CF}} = 10$  Hz), 133.4, 137.9, 138.9, 158.3, 161.6 (d,  $^1J_{\text{CF}} = 246$  Hz), 163.9; HRMS calcd for  $\text{C}_{20}\text{H}_{16}\text{FN}_3\text{O}_2$  ( $\text{M}^+\text{+H}$ ): 350.1305, found: 350.1321.

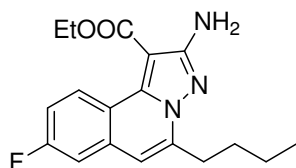

Ethyl 2-amino-5-butyl-8-fluoro-5H-pyrazolo[5,1-a]isoquinoline-1-carboxylate (**4o**).  $^1\text{H}$  NMR (400 MHz,  $\text{CDCl}_3$ ): 0.99 (t,  $J = 7.2$  Hz, 3H), 1.47 (t,  $J = 7.2$  Hz, 3H), 1.43-1.52 (m, 2H), 1.75-1.83 (m, 2H), 3.01-3.04 (m, 2H), 4.43-4.48 (m, 2H), 5.21 (s, 2H), 6.80 (s, 1H), 7.21-7.25 (m, 2H), 9.70-9.74 (m, 1H);  $^{13}\text{C}$  NMR (100 MHz,  $\text{CDCl}_3$ )  $\delta$  14.2, 14.8, 22.8, 29.1, 31.1, 60.6, 93.0, 110.4, 110.7 (d,  $^2J_{\text{CF}} = 22$  Hz), 115.1 (d,  $^2J_{\text{CF}} = 23$  Hz), 119.4, 130.6 (d,  $^3J_{\text{CF}} = 9$  Hz), 133.5 (d,  $^3J_{\text{CF}} = 9$  Hz), 139.9, 140.0, 158.4, 162.6 (d,  $^1J_{\text{CF}} = 248$  Hz), 164.8; HRMS calcd for  $\text{C}_{18}\text{H}_{20}\text{FN}_3\text{O}_2$  ( $\text{M}^+\text{+H}$ ): 330.1618, found:

330.1592.

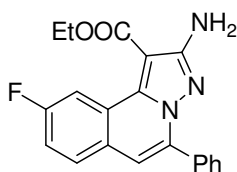

Ethyl 2-amino-9-fluoro-5-phenyl*H*-pyrazolo[5,1-*a*]isoquinoline-1-carboxylate (**4p**).

$^1\text{H}$  NMR (400 MHz,  $\text{DMSO-}d_6$ ): 1.38 (t,  $J = 6.8$  Hz, 3H), 4.35-4.41 (m, 2H), 6.09 (s, 2H), 7.39 (s, 1H), 7.48-7.58 (m, 4H), 7.75-7.77 (m, 2H), 7.98 (t,  $J = 6.8$  Hz, 1H), 9.45-9.48 (m, 1H);  $^{13}\text{C}$  NMR (100 MHz,  $\text{DMSO-}d_6$ )  $\delta$  14.2, 60.0, 92.1, 111.3 (d,  $^2J_{\text{CF}} = 25$  Hz), 113.0, 118.9 (d,  $^2J_{\text{CF}} = 24$  Hz), 119.0, 123.1, 127.7, 128.1, 129.0, 129.6, 130.0, 133.5, 136.4, 158.3, 160.2 (d,  $^1J_{\text{CF}} = 232$  Hz), 163.9; HRMS calcd for  $\text{C}_{20}\text{H}_{16}\text{FN}_3\text{O}_2$  ( $\text{M}^+\text{+H}$ ): 350.1305, found: 350.1305.

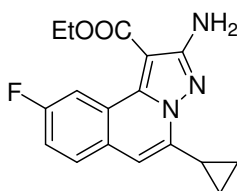

Ethyl 2-amino-5-cyclopropyl-9-fluoro*H*-pyrazolo[5,1-*a*]isoquinoline-1-carboxylate (**4q**).  $^1\text{H}$  NMR (400 MHz,  $\text{CDCl}_3$ ): 0.84-0.85 (m, 2H), 1.03-1.05 (m, 2H), 1.35 (t,  $J = 6.8$  Hz, 3H), 2.45-2.50 (m, 1H), 4.32-4.34 (m, 2H), 6.09 (s, 2H), 6.94 (s, 1H), 7.38-7.42 (m, 1H), 7.72-7.75 (m, 1H), 9.30-9.33 (m, 1H);  $^{13}\text{C}$  NMR (100 MHz,  $\text{CDCl}_3$ )  $\delta$  7.3, 11.3, 14.2, 59.9, 91.9, 107.0, 111.1 (d,  $^2J_{\text{CF}} = 26$  Hz), 117.4 (d,  $^2J_{\text{CF}} = 24$  Hz), 122.1 (d,  $^3J_{\text{CF}} = 11$  Hz), 127.7, 129.1 (d,  $^3J_{\text{CF}} = 9$  Hz), 137.8, 139.2, 158.4, 159.6 (d,  $^1J_{\text{CF}} = 240$  Hz), 163.9; HRMS calcd for  $\text{C}_{17}\text{H}_{16}\text{FN}_3\text{O}_2$  ( $\text{M}^+\text{+Na}$ ): 336.1124, found: 336.1143.

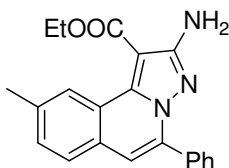

Ethyl 2-amino-9-methyl-5-phenyl*H*-pyrazolo[5,1-*a*]isoquinoline-1-carboxylate (**4r**).  $^1\text{H}$  NMR (400 MHz,  $\text{CDCl}_3$ ): 1.50 (t,  $J = 7.2$  Hz, 3H), 2.58 (s, 3H), 4.46-4.51 (m, 2H), 5.18 (s, 2H), 7.05 (s, 1H), 7.42 (d,  $J = 7.6$  Hz, 1H), 7.46-7.52 (m, 3H), 7.61 (d,  $J = 8.0$  Hz, 1H), 7.77-7.79 (m, 2H), 9.46 (s, 1H);  $^{13}\text{C}$  NMR (100 MHz,  $\text{CDCl}_3$ )  $\delta$  14.5, 22.0,



60.2, 92.7, 113.9, 122.9, 126.7, 126.8, 128.1, 129.0, 129.1, 129.5, 130.5, 133.9, 136.7,  
139.7, 147.0, 158.3, 164.6; HRMS calcd for  $C_{21}H_{19}N_3O_2$  ( $M^+ + H$ ): 346.1556, found:  
346.1558.

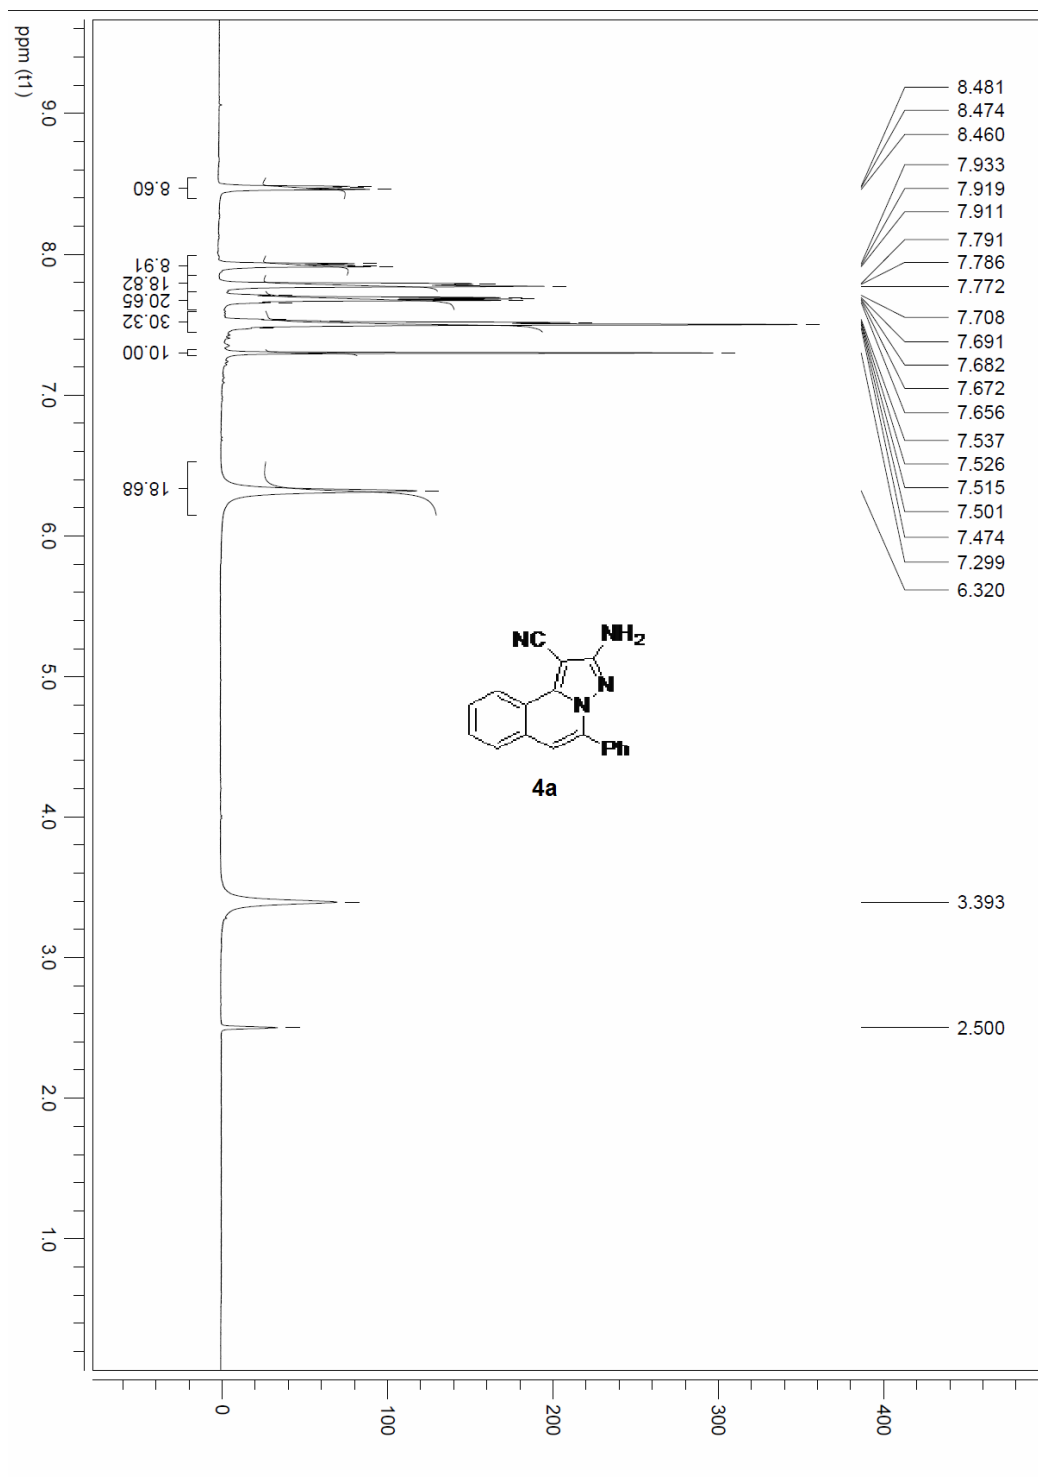

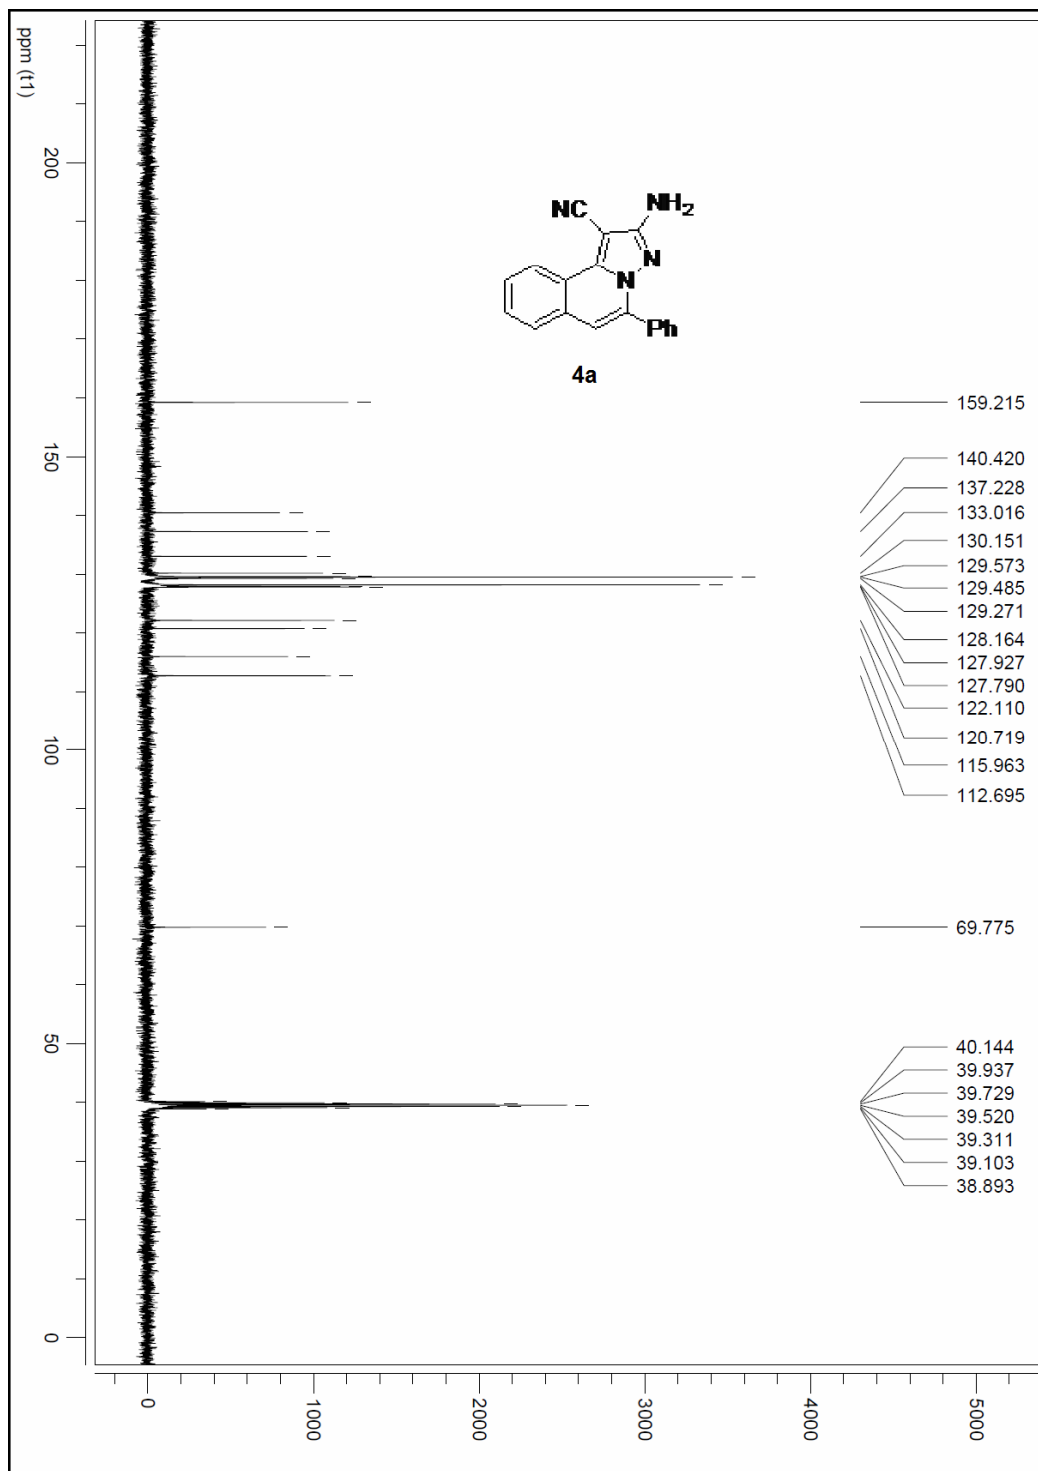

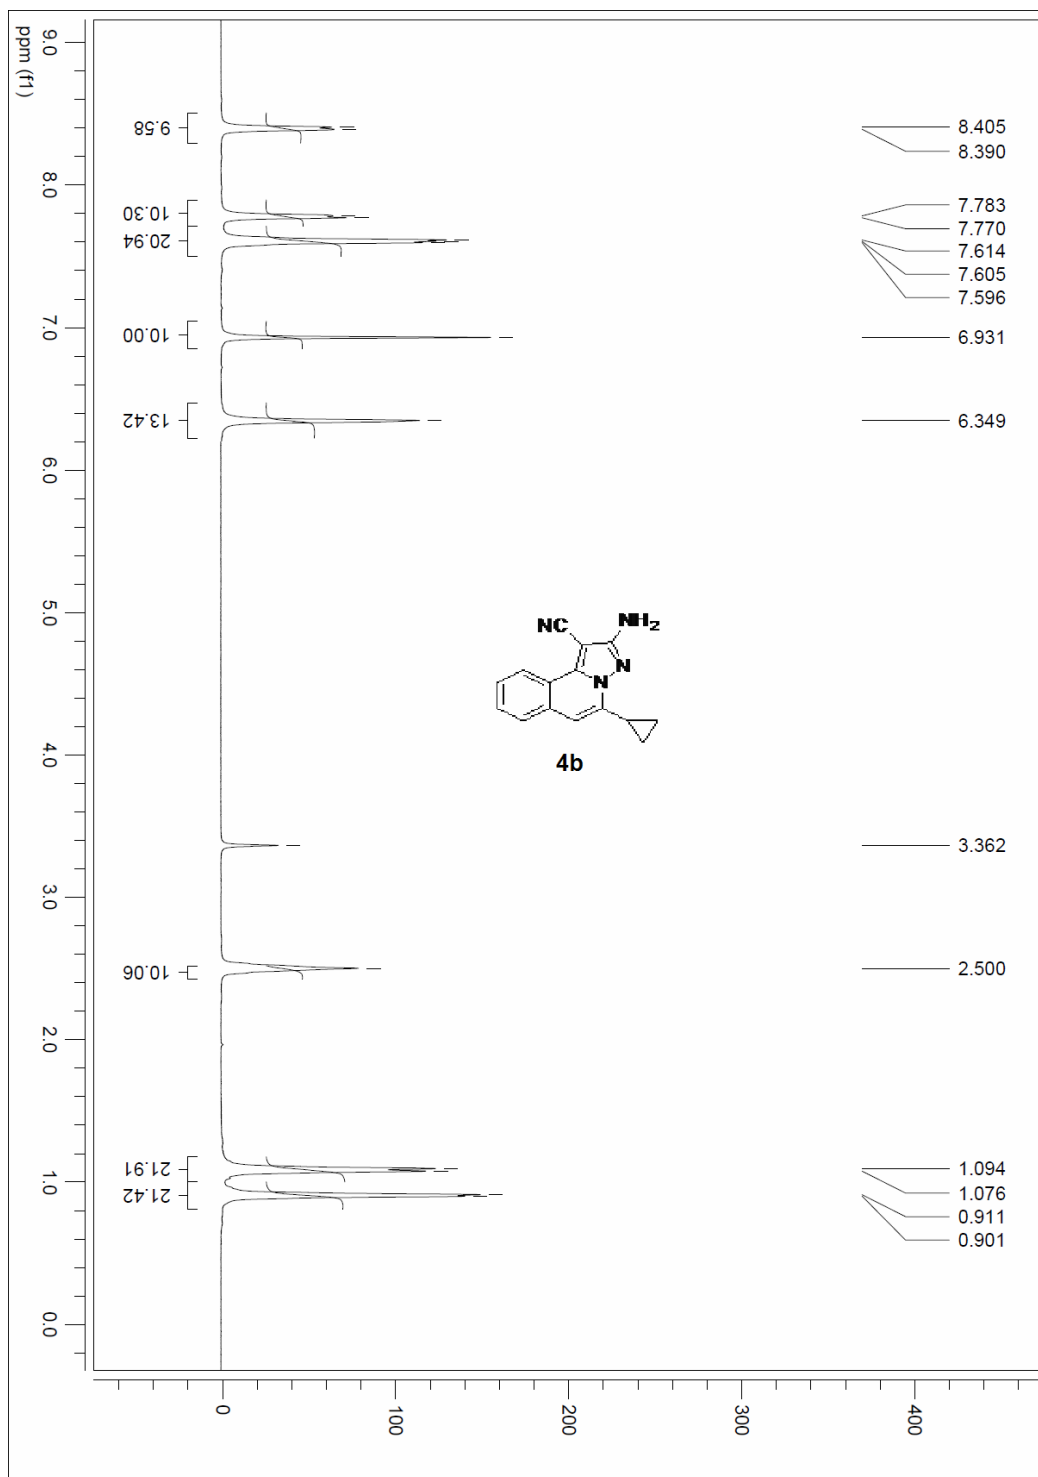

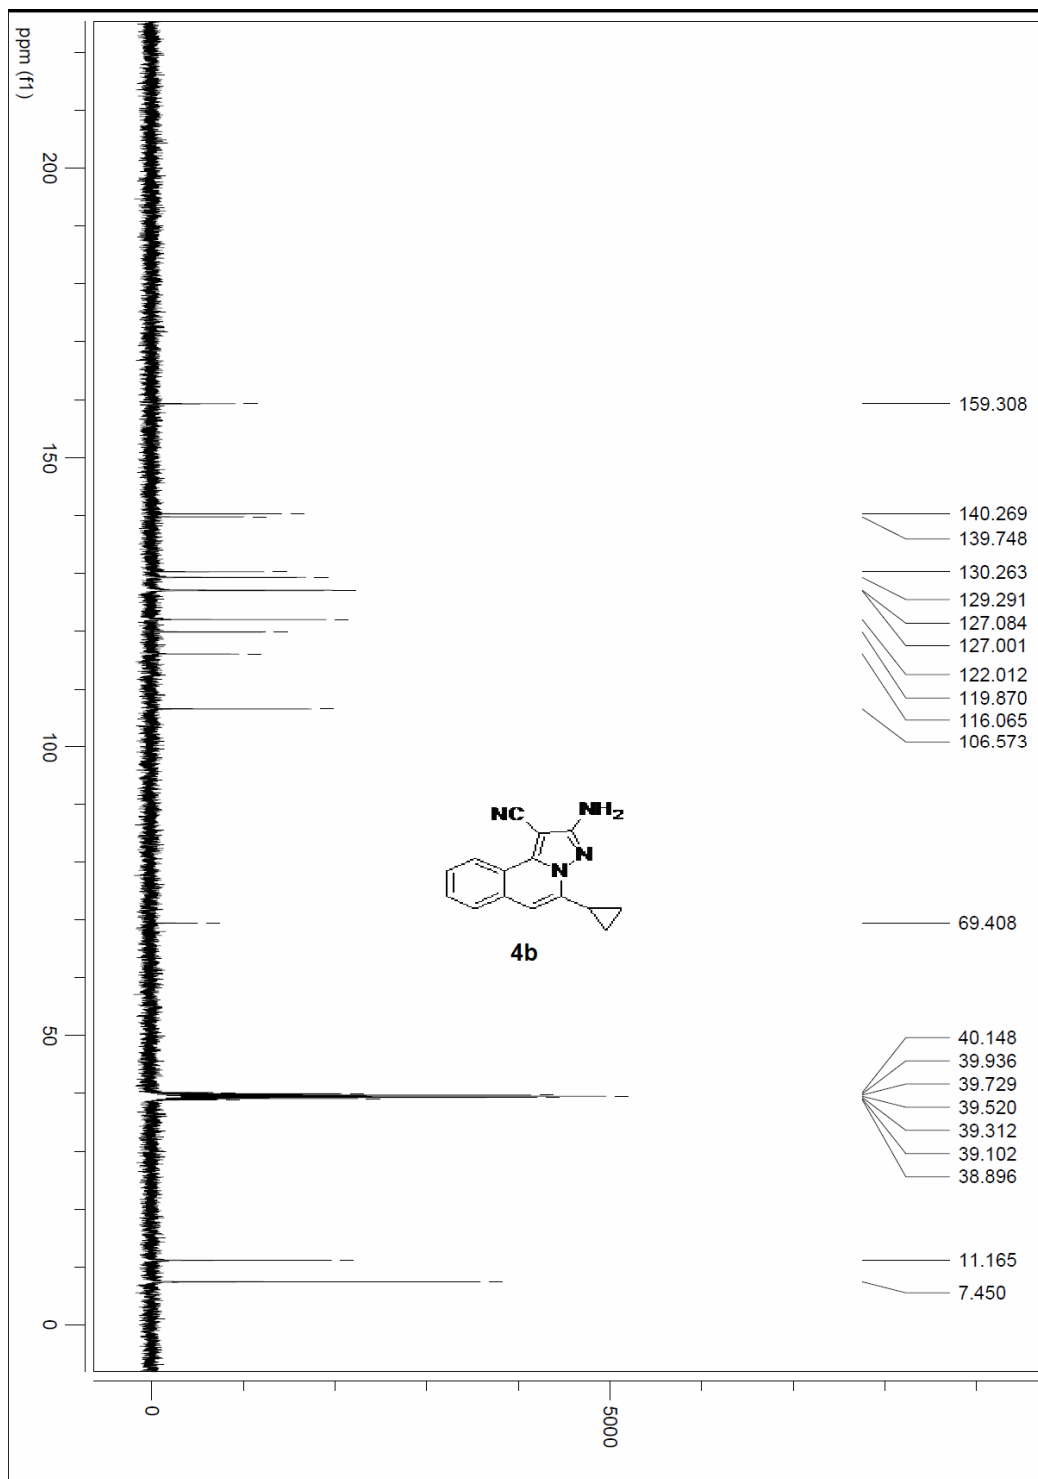

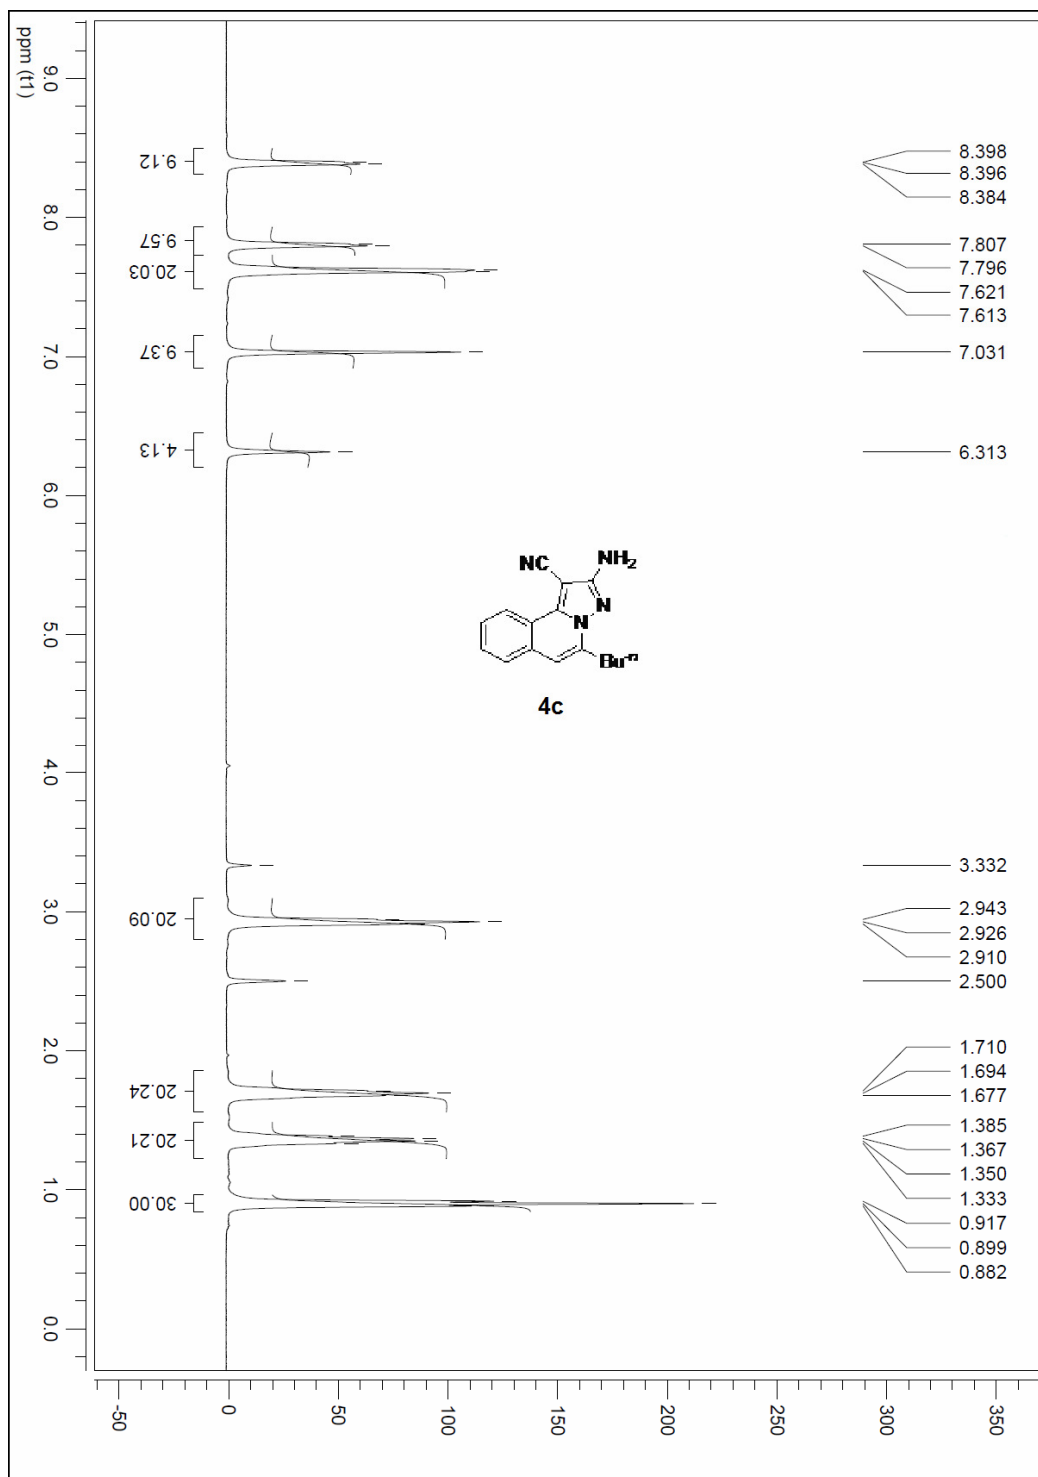

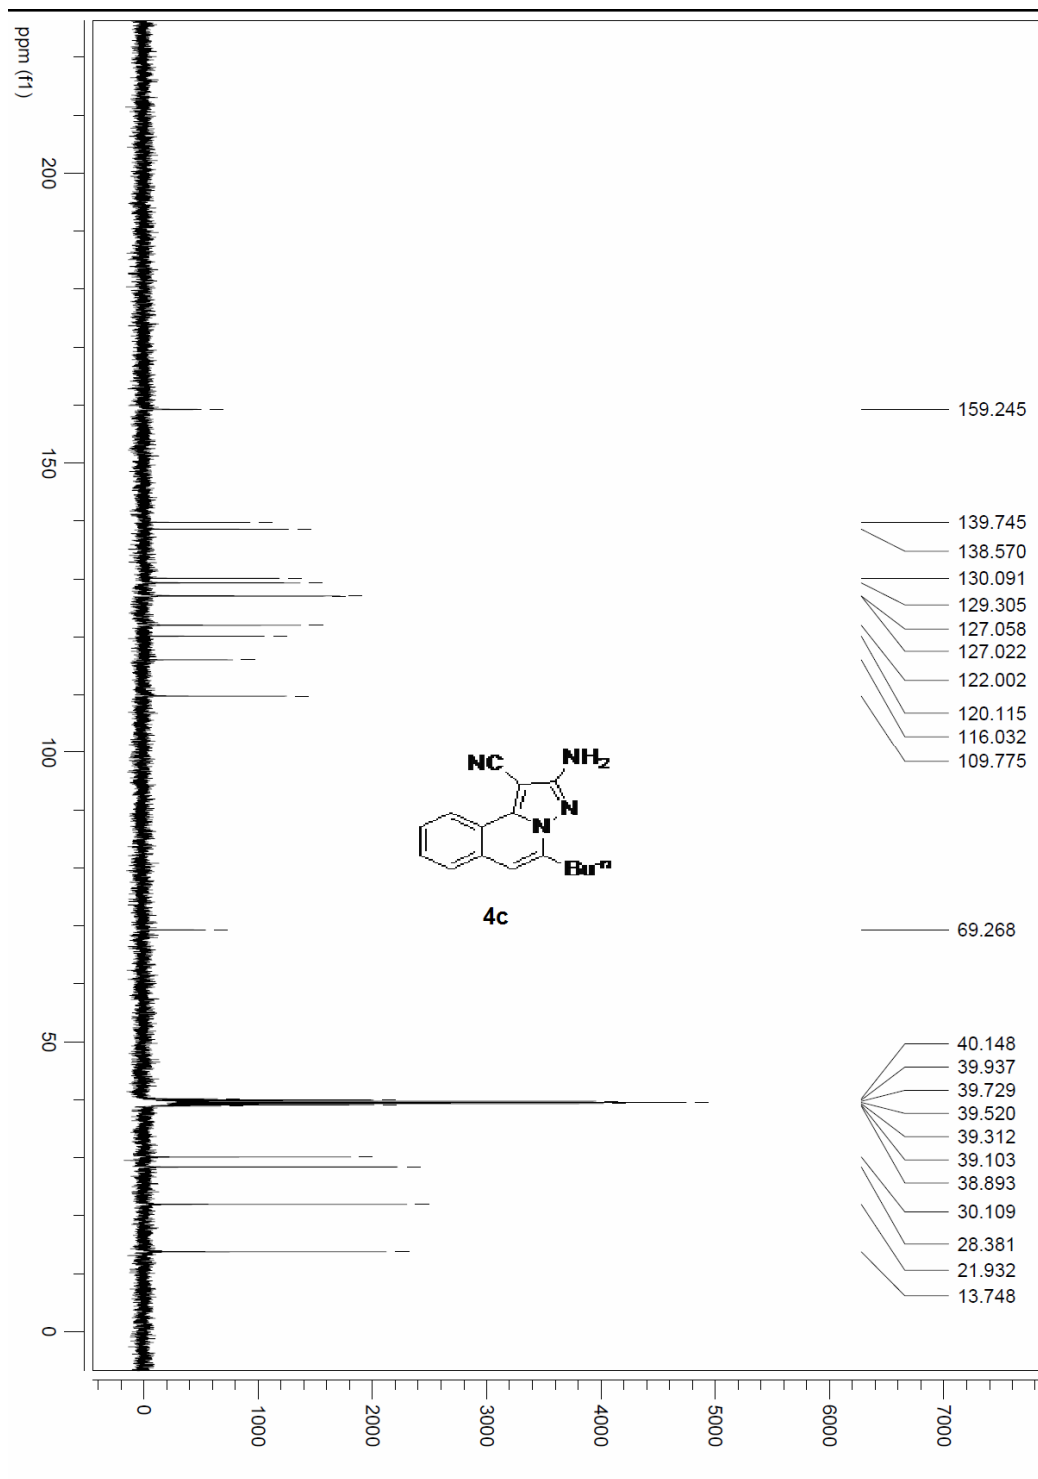

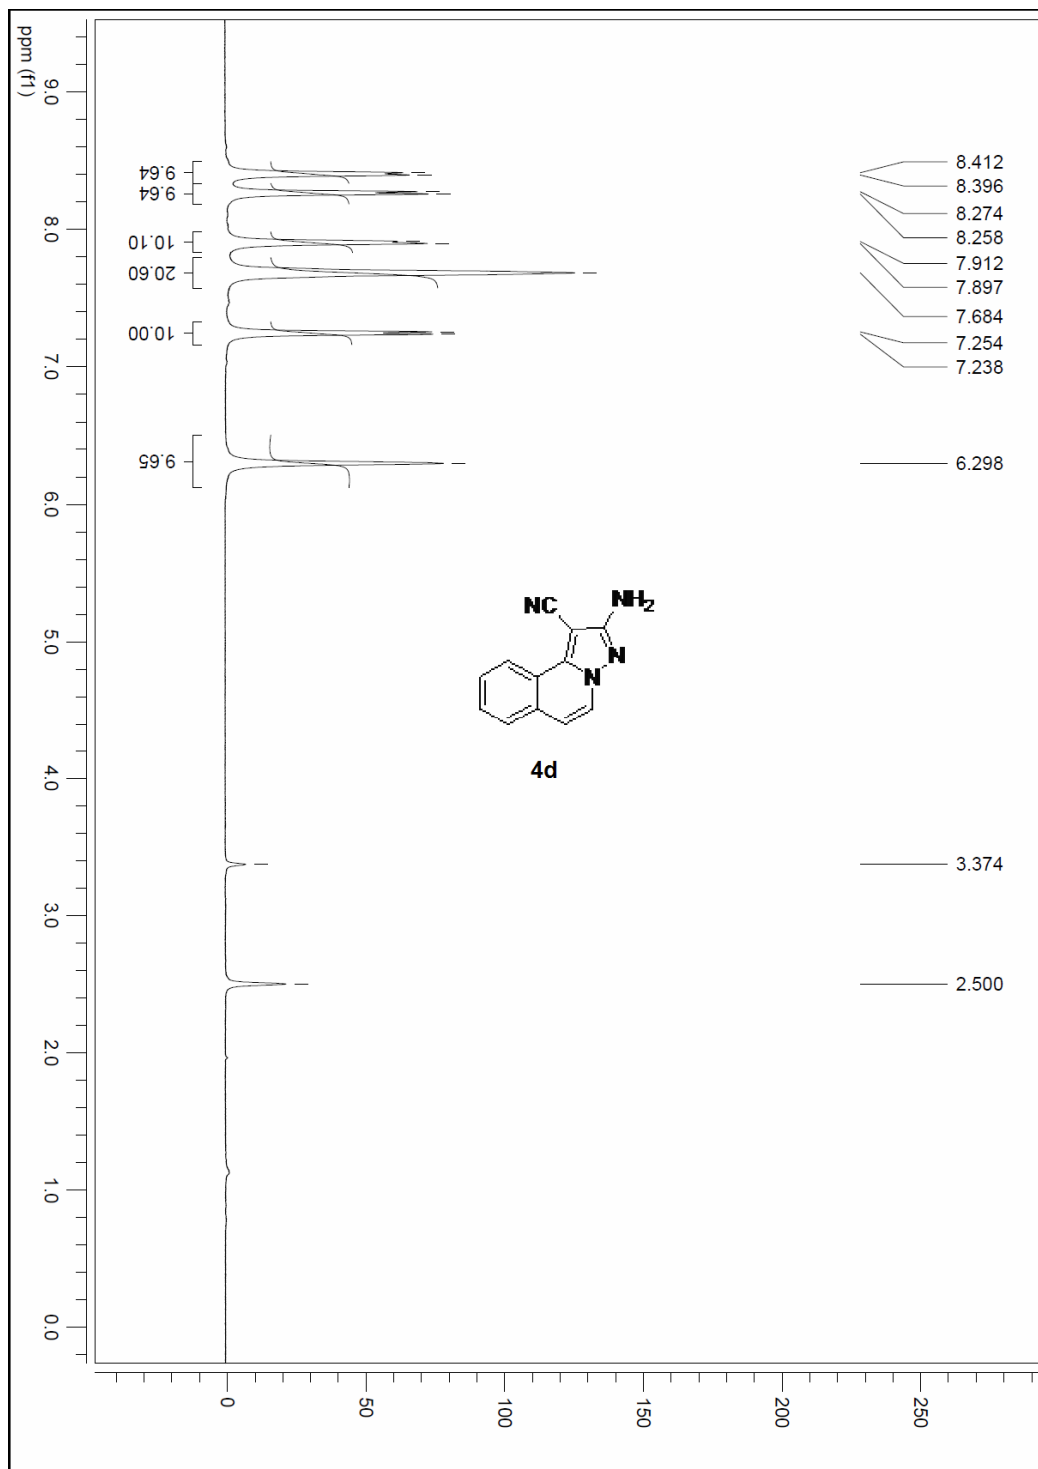



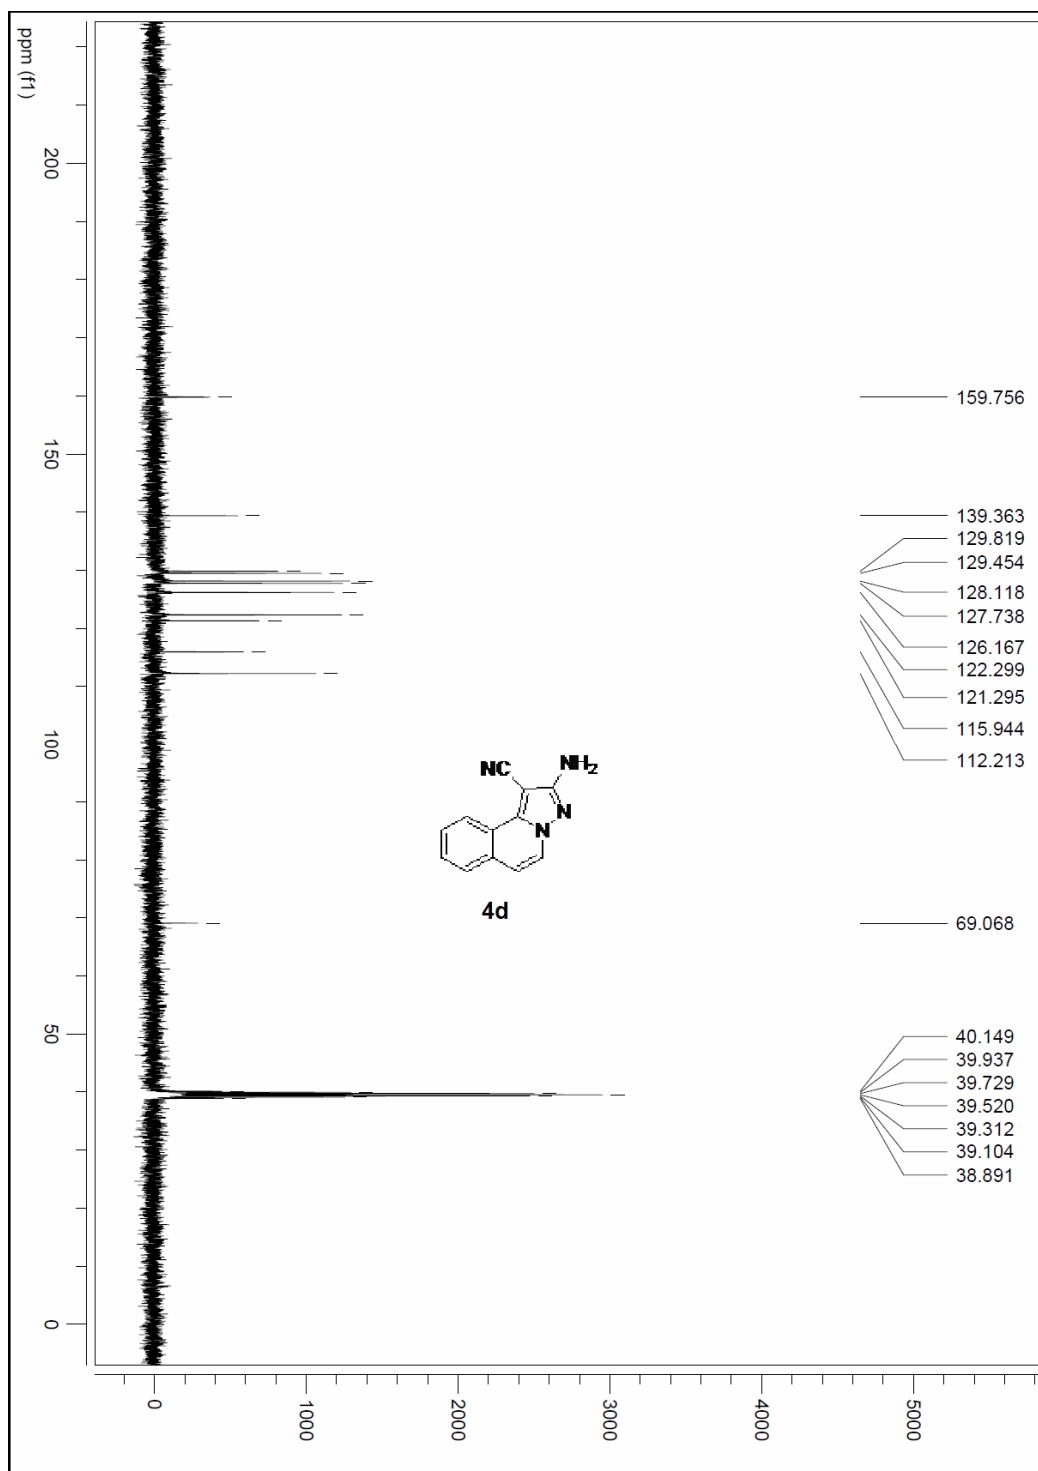

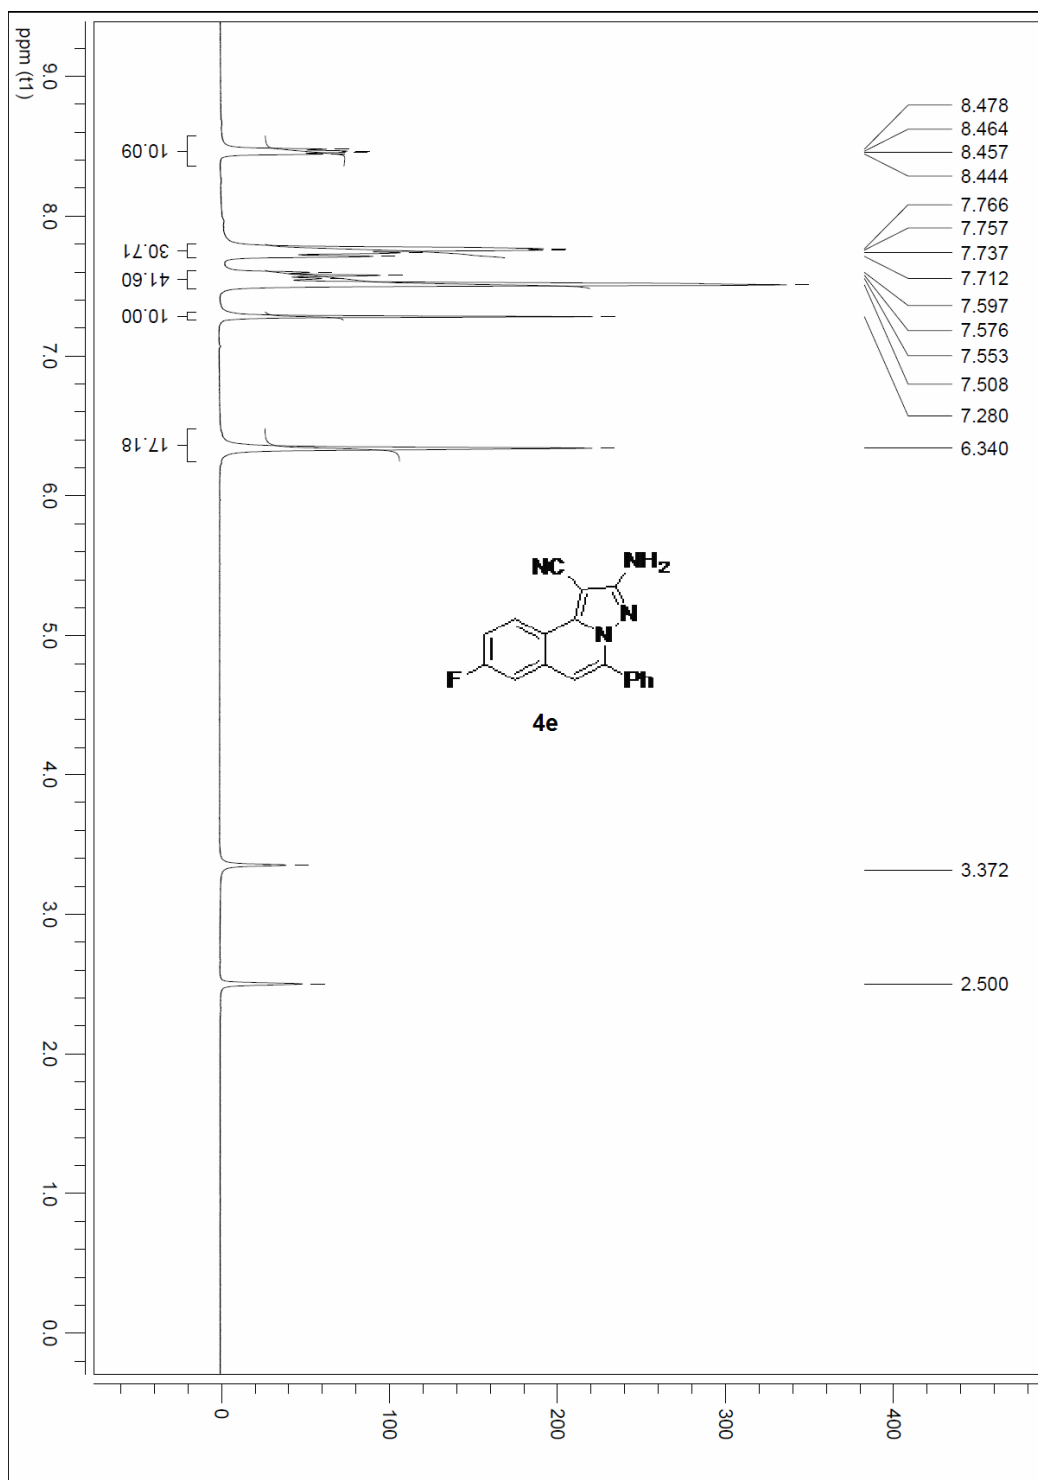

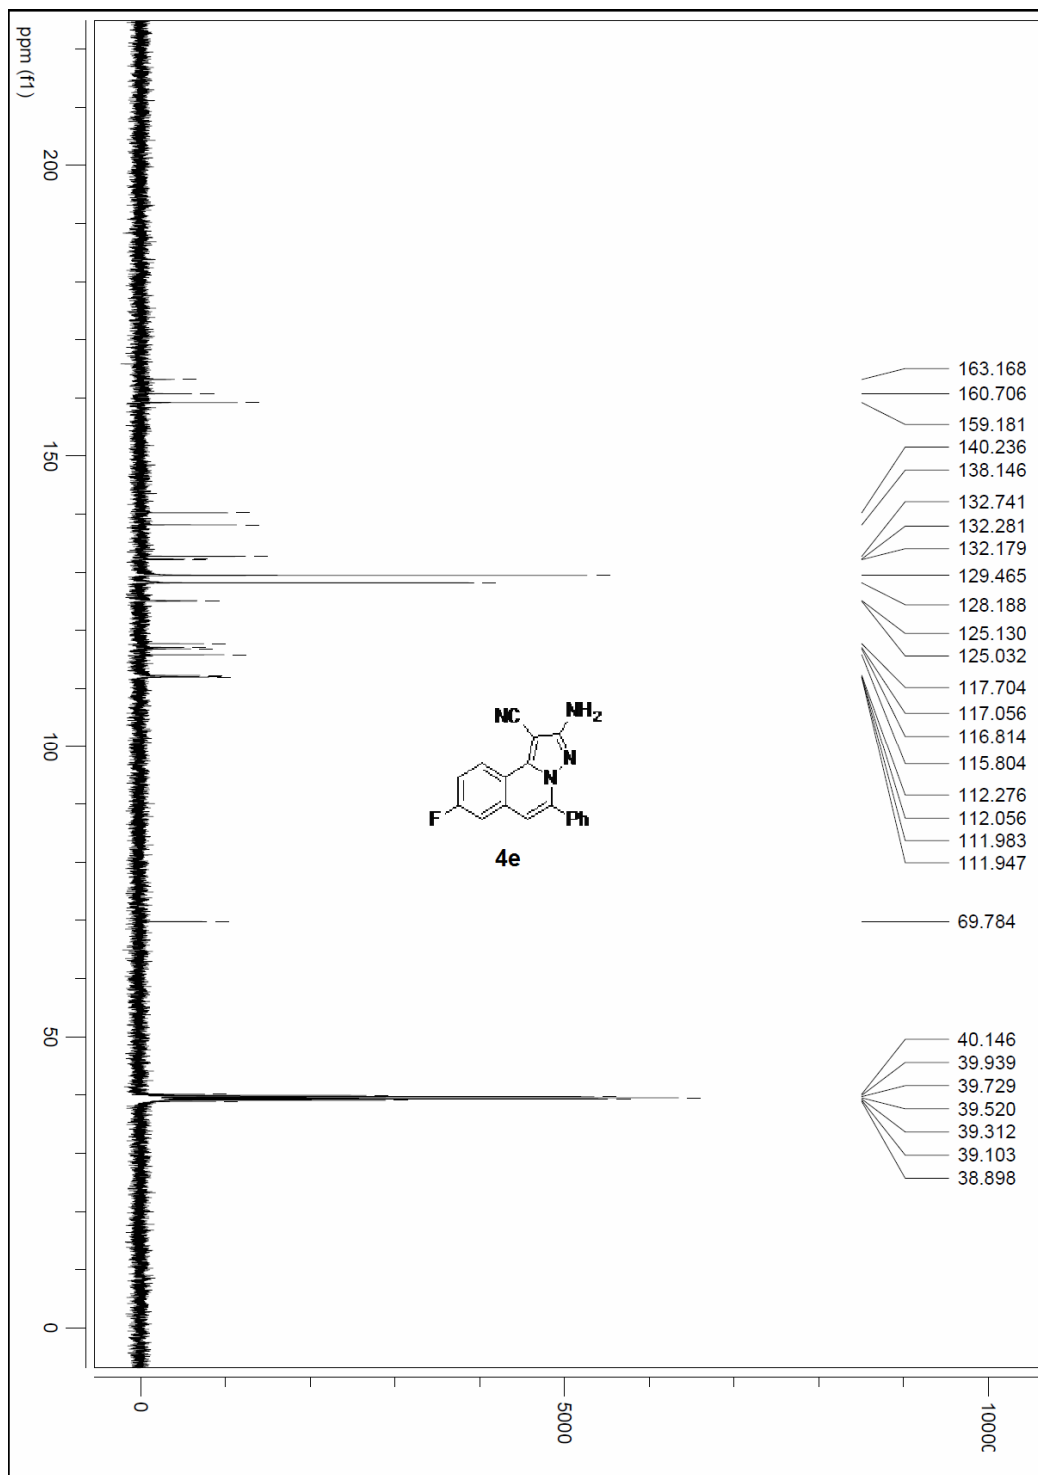

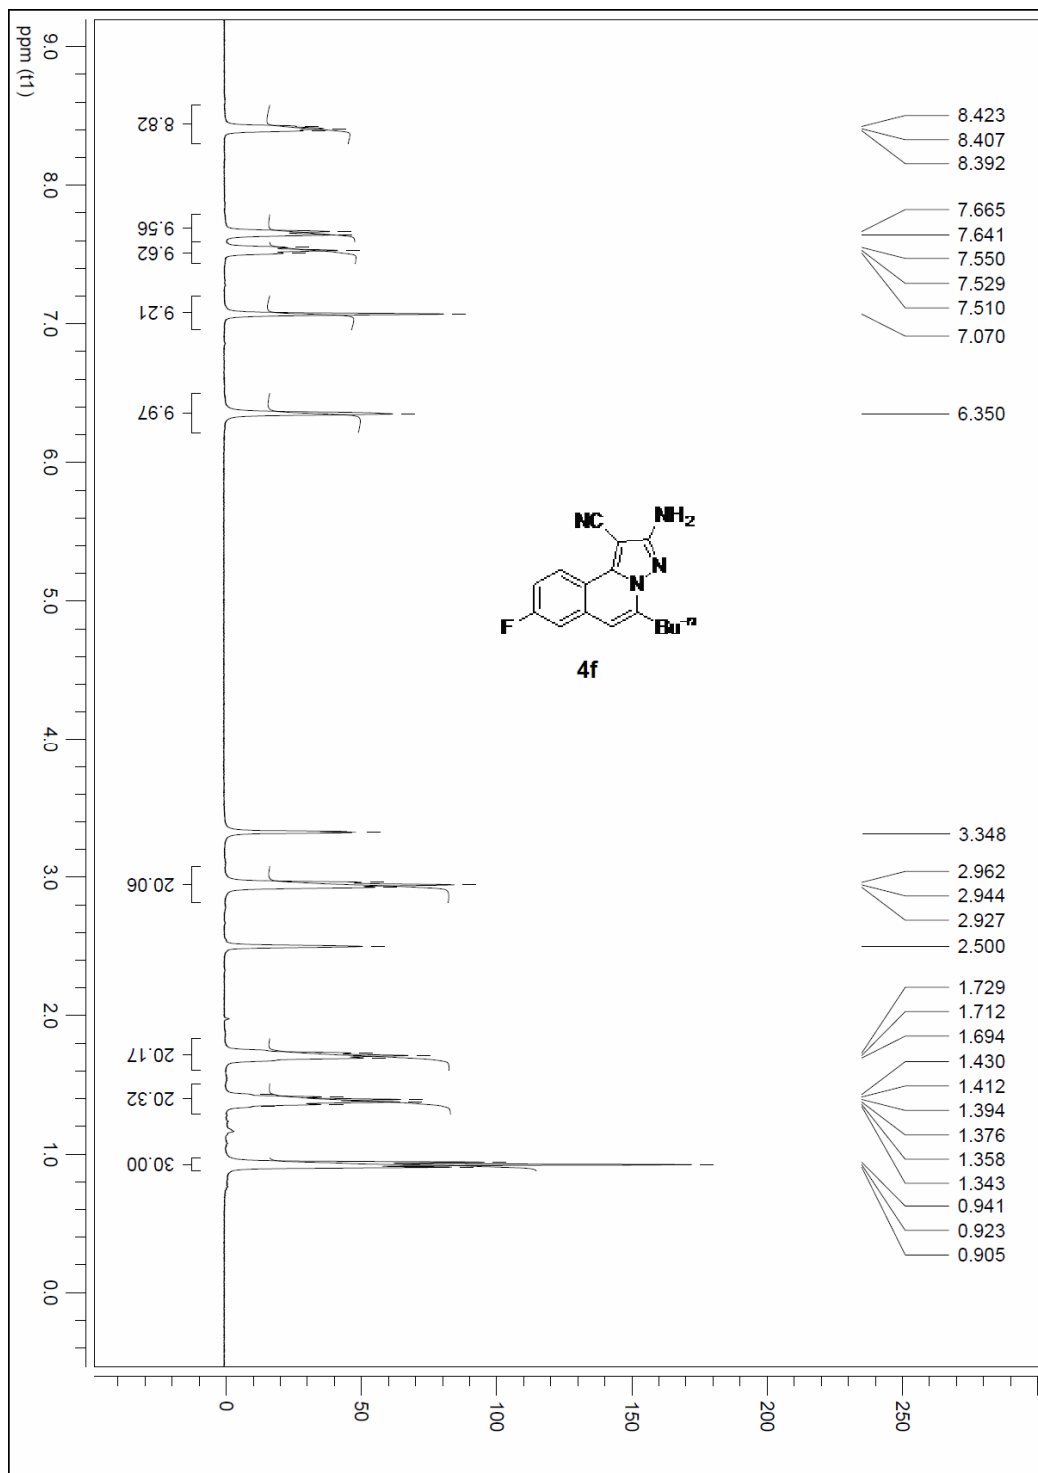

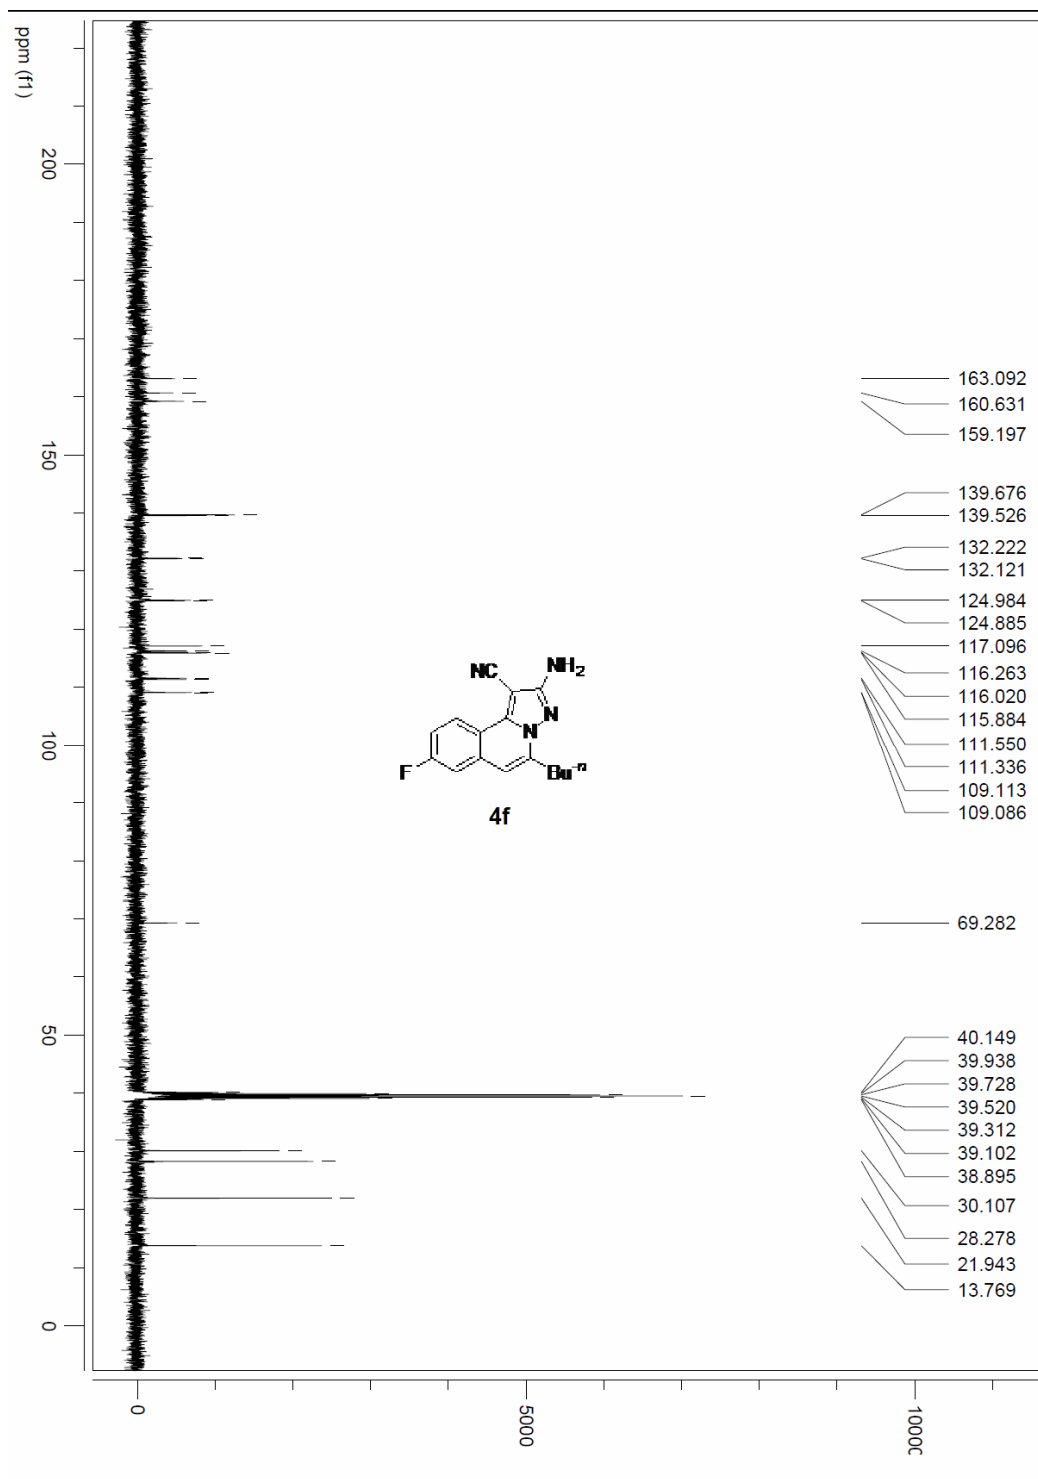

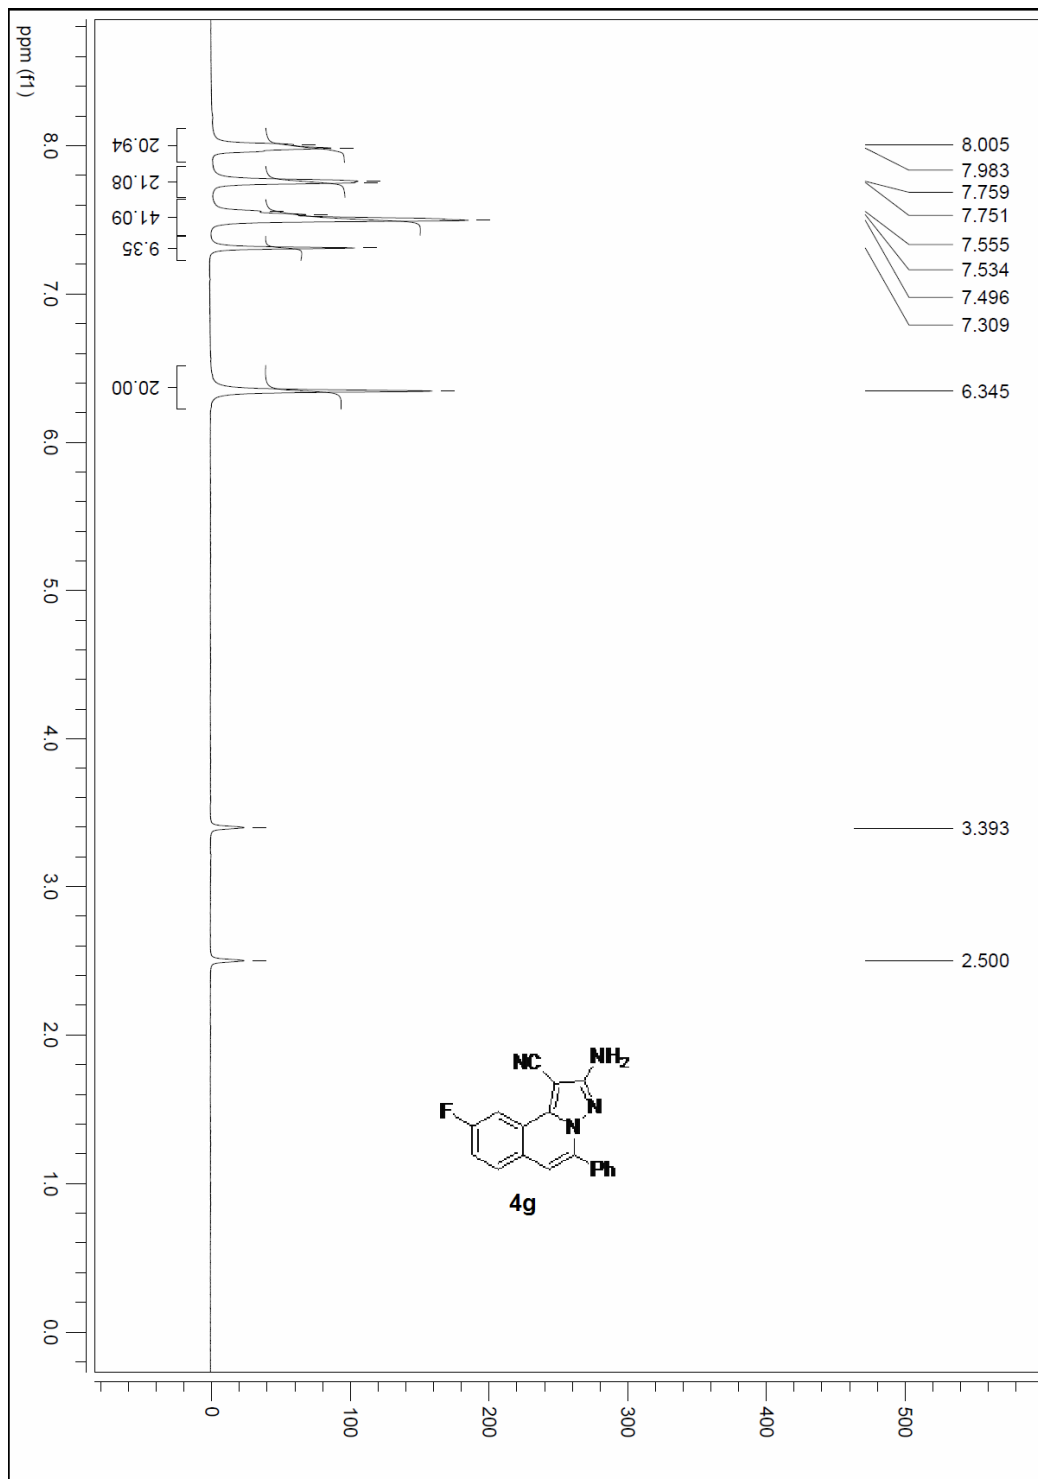

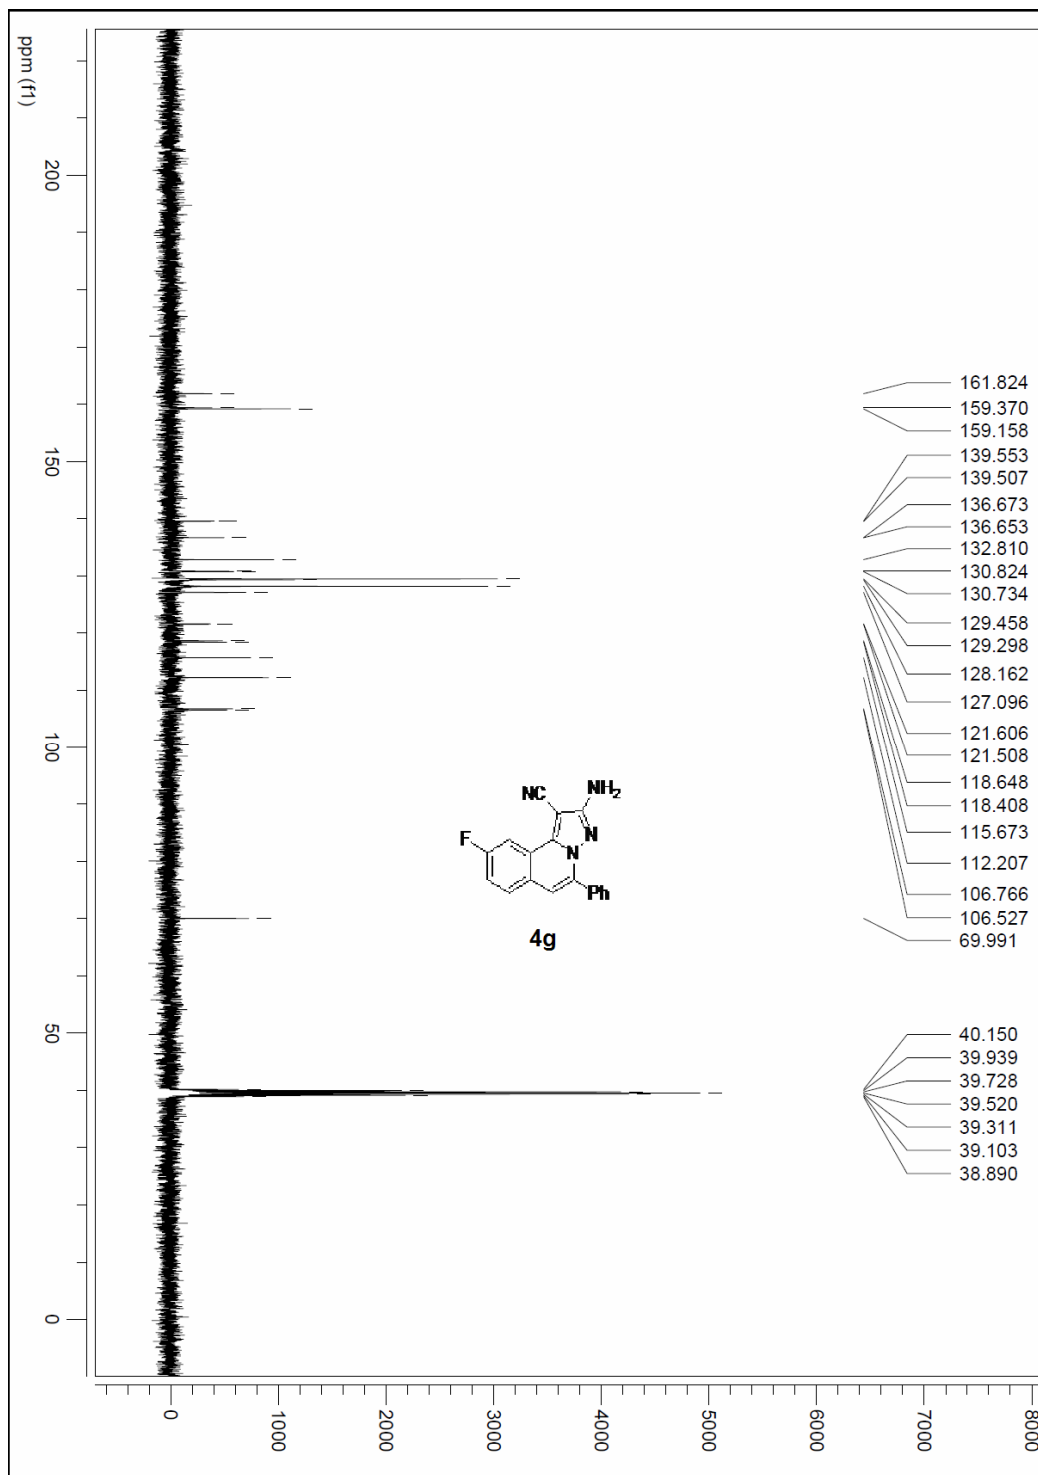

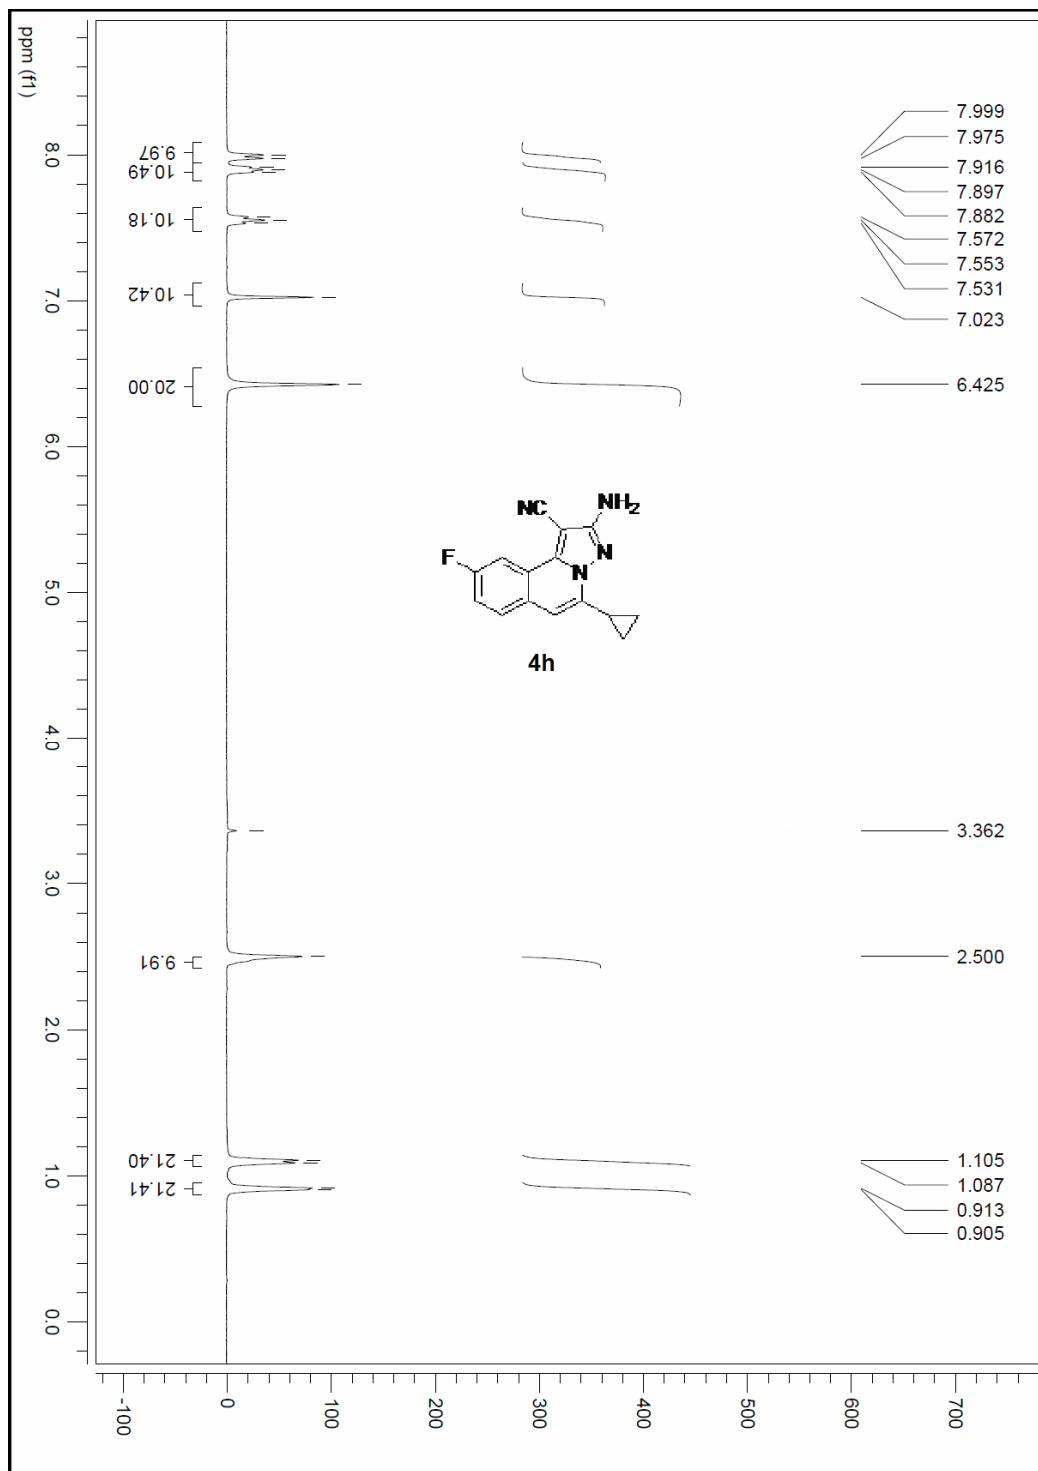



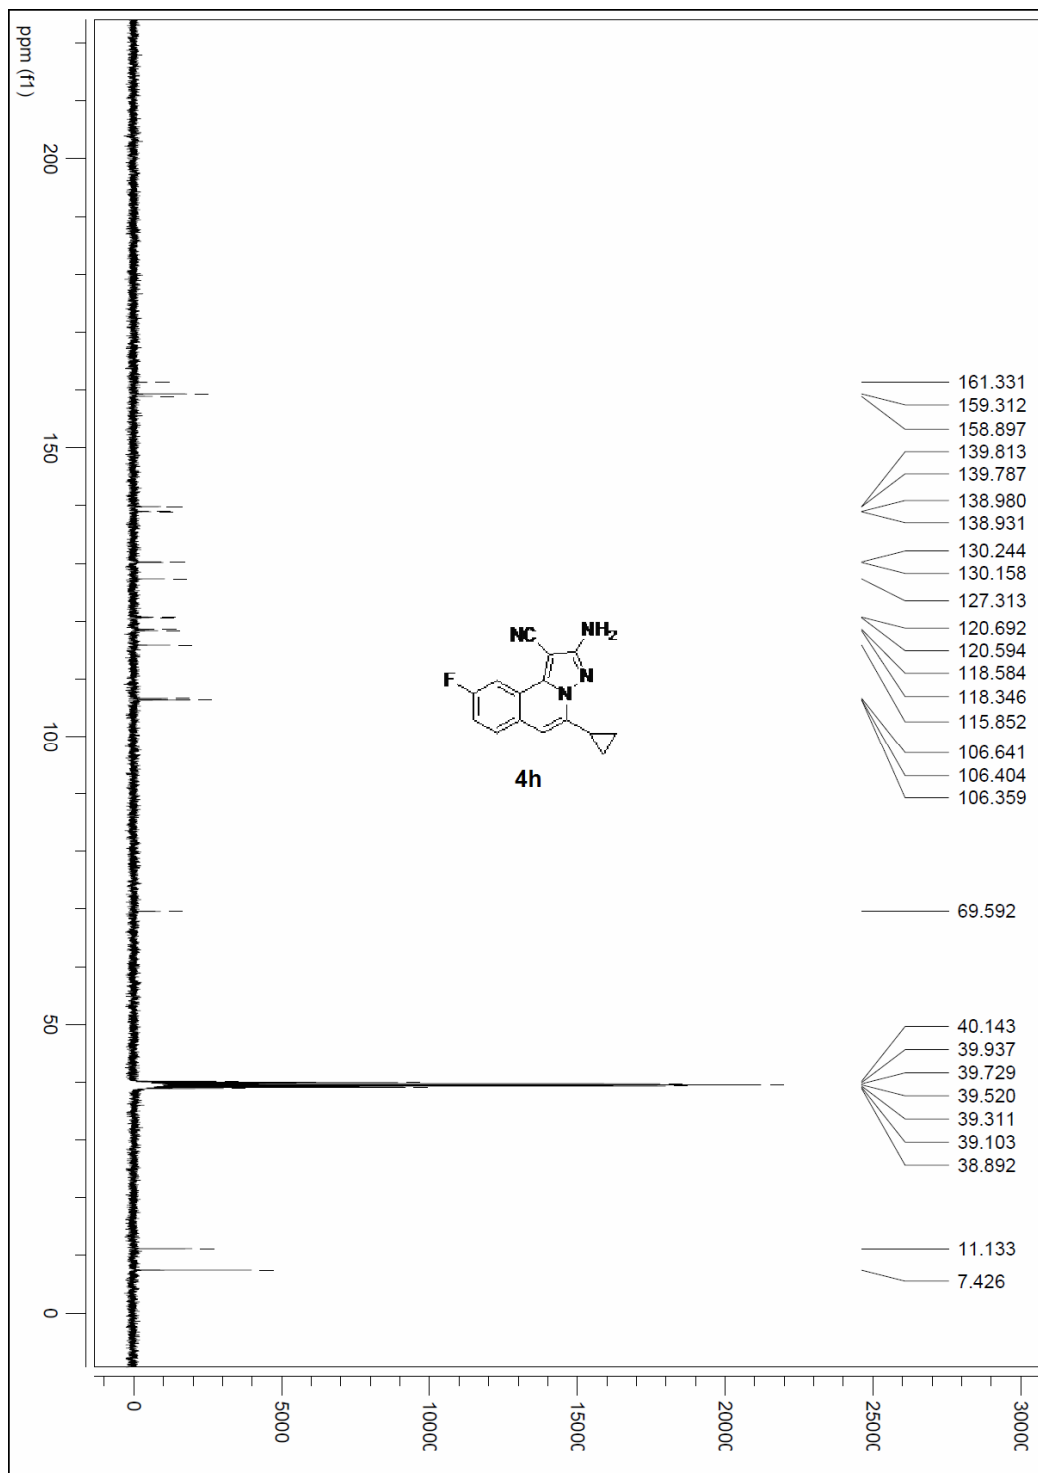

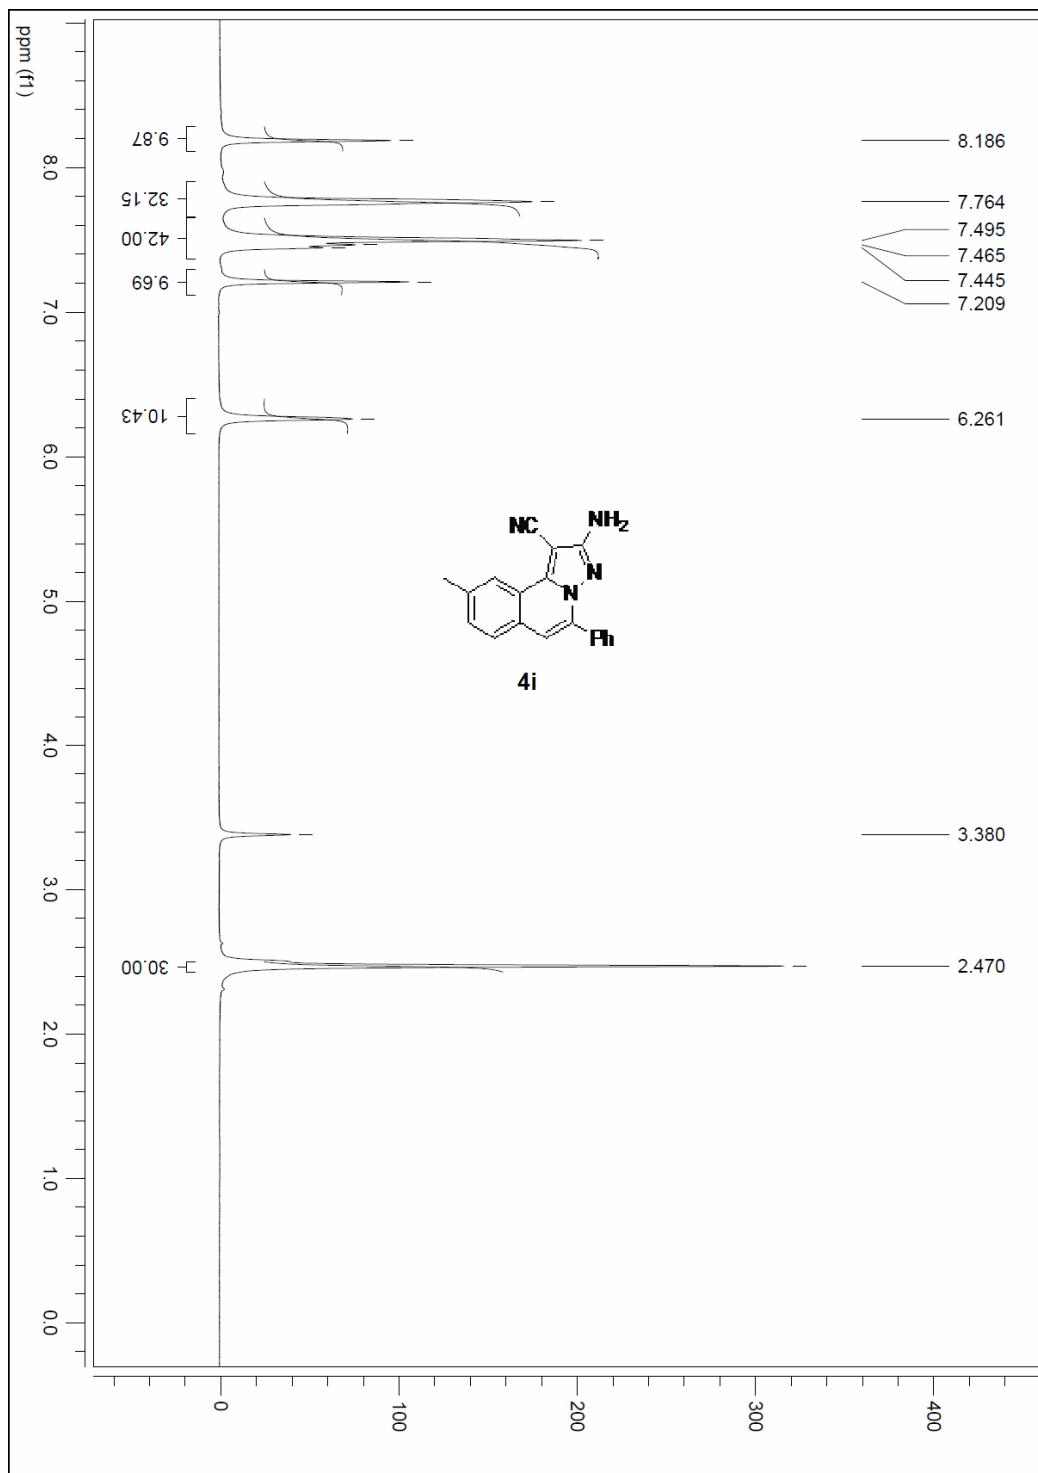

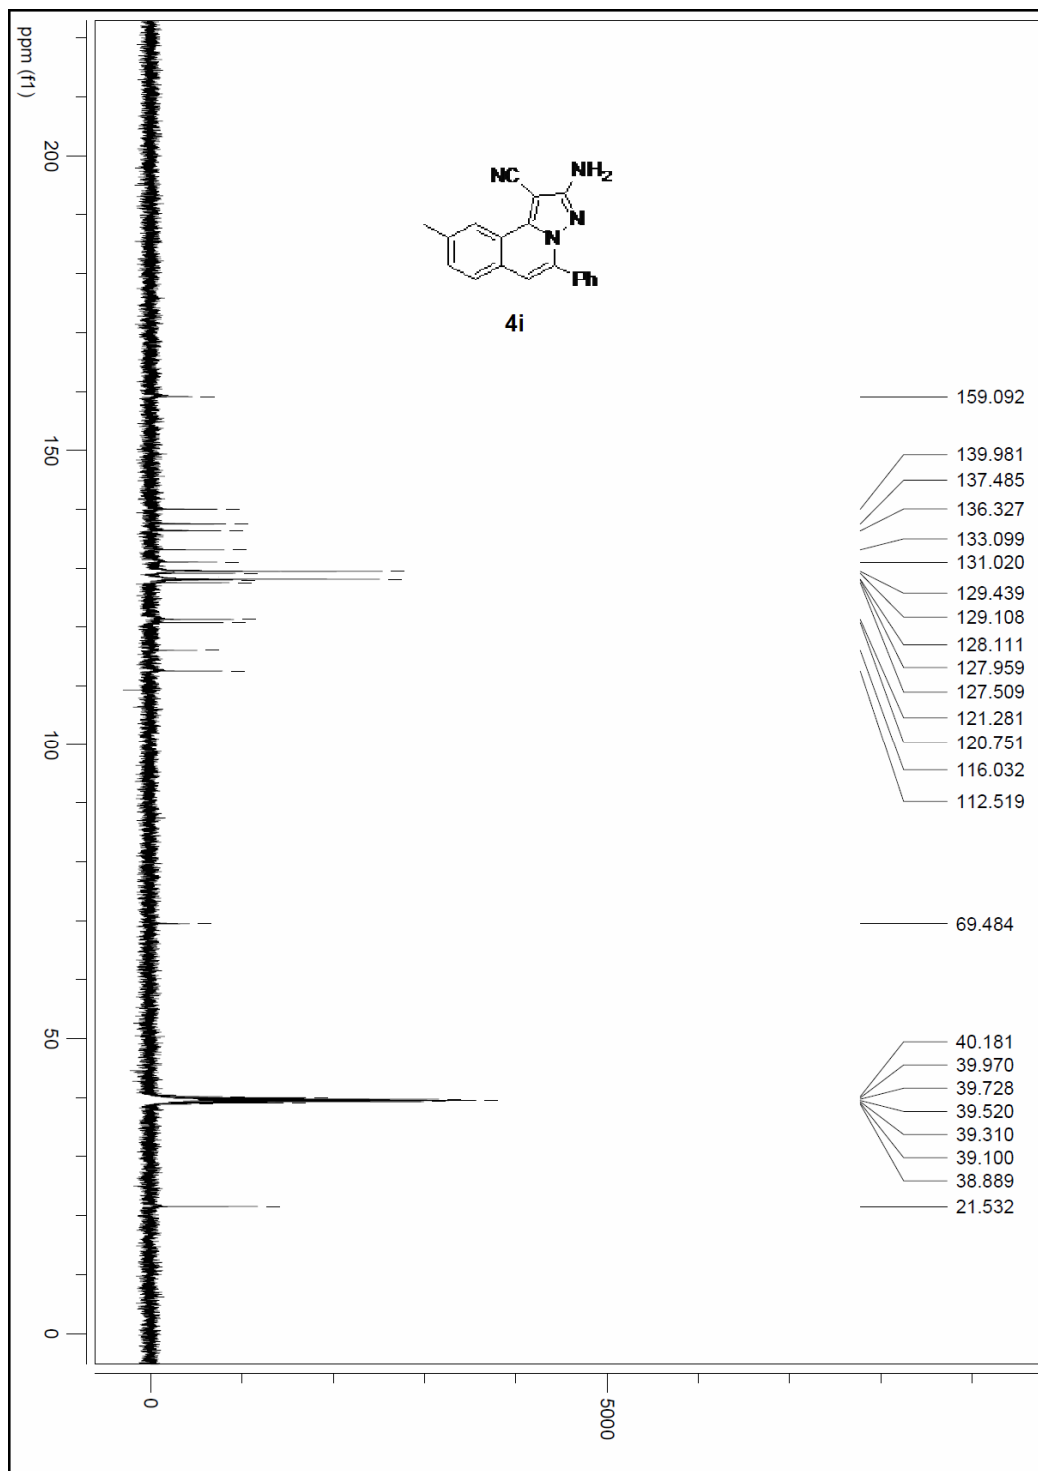

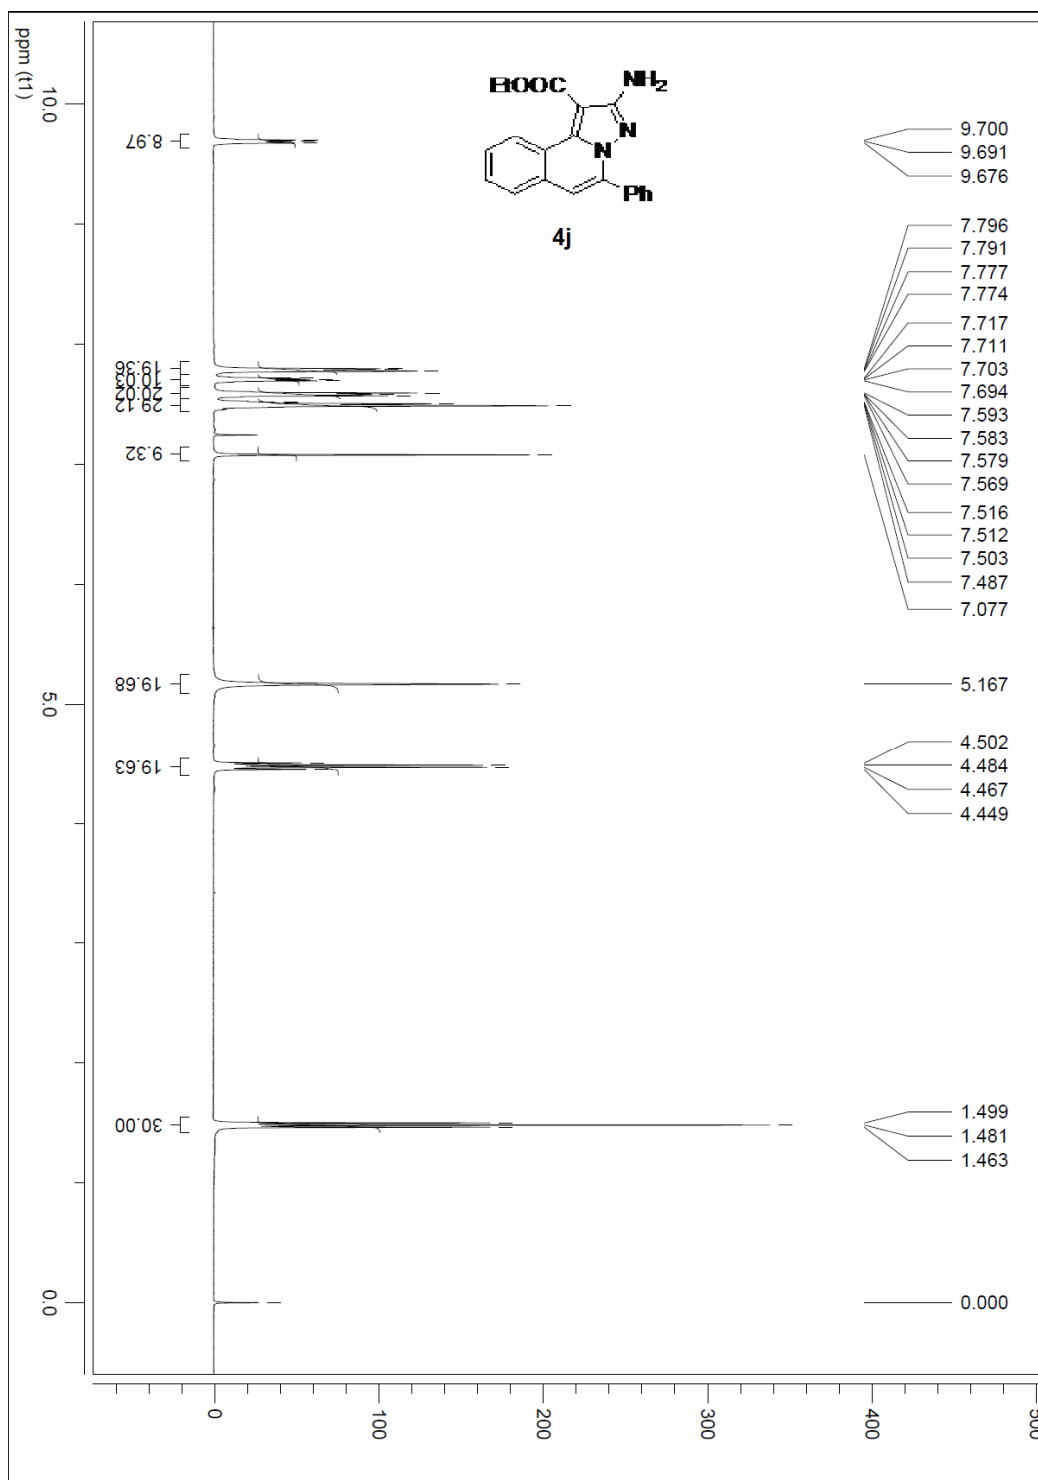

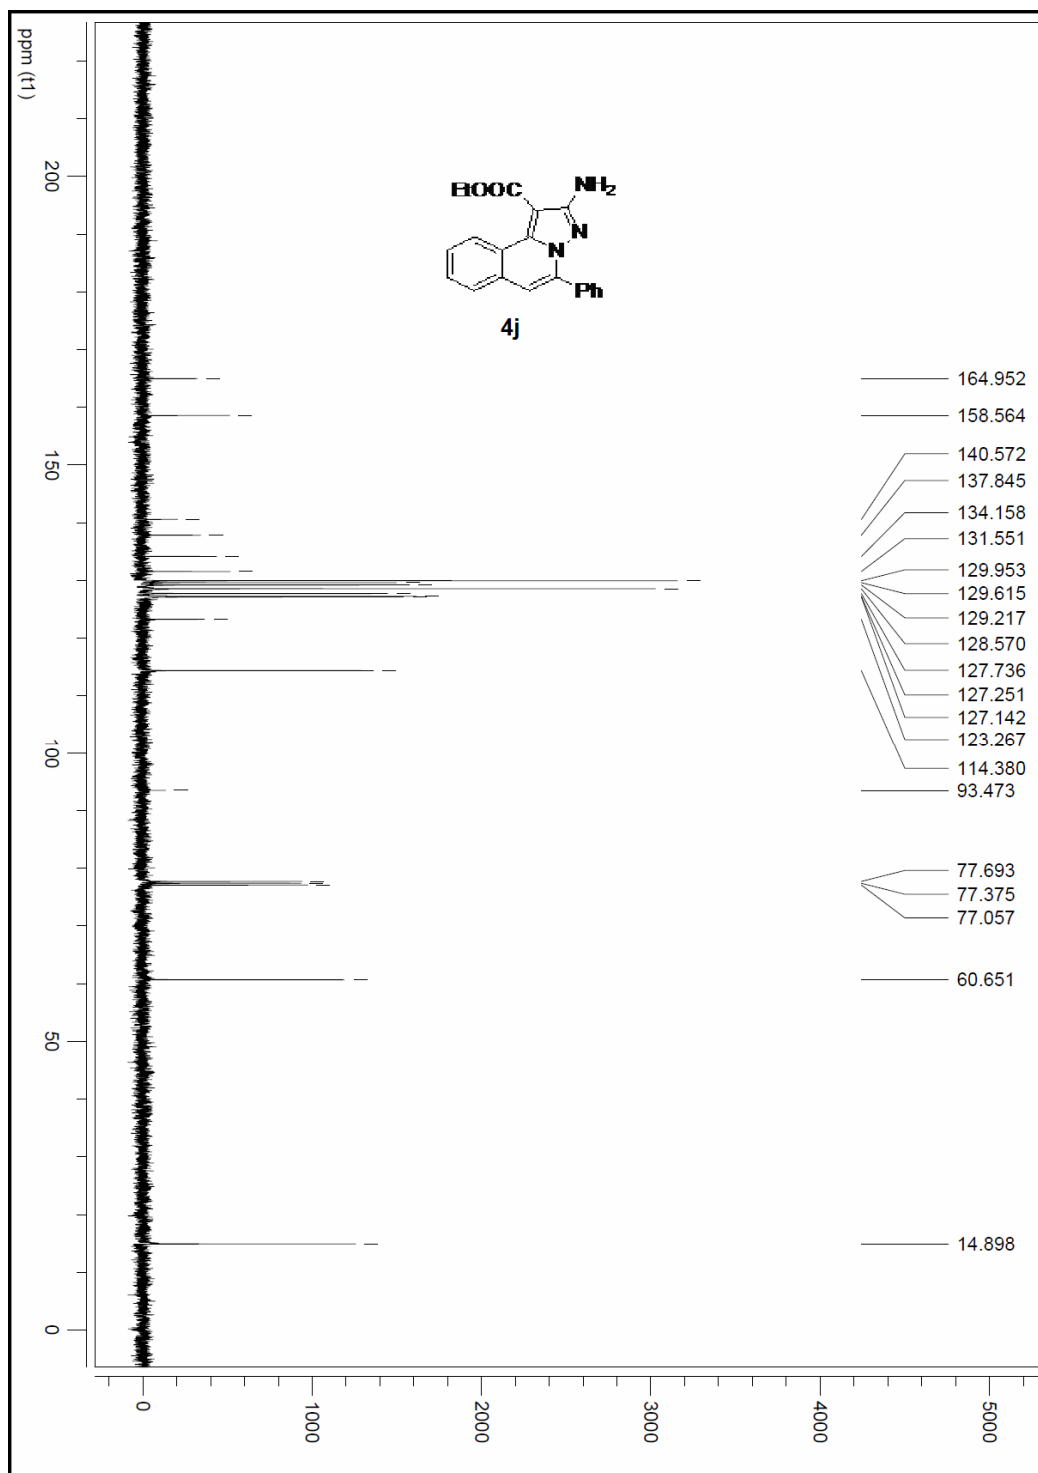

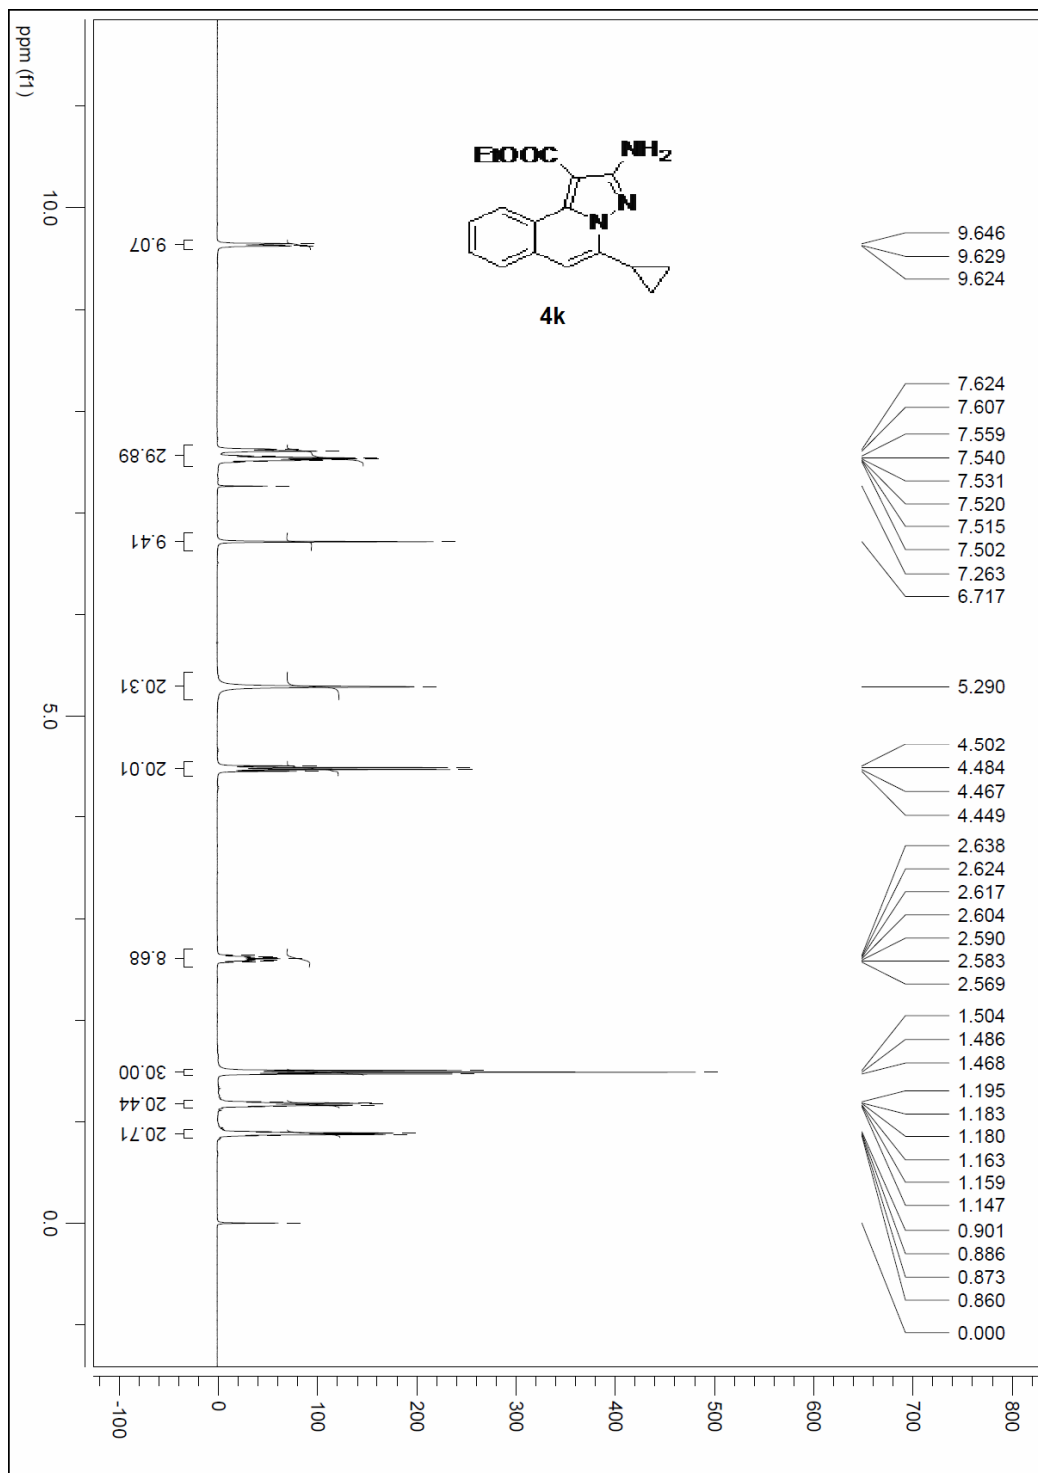

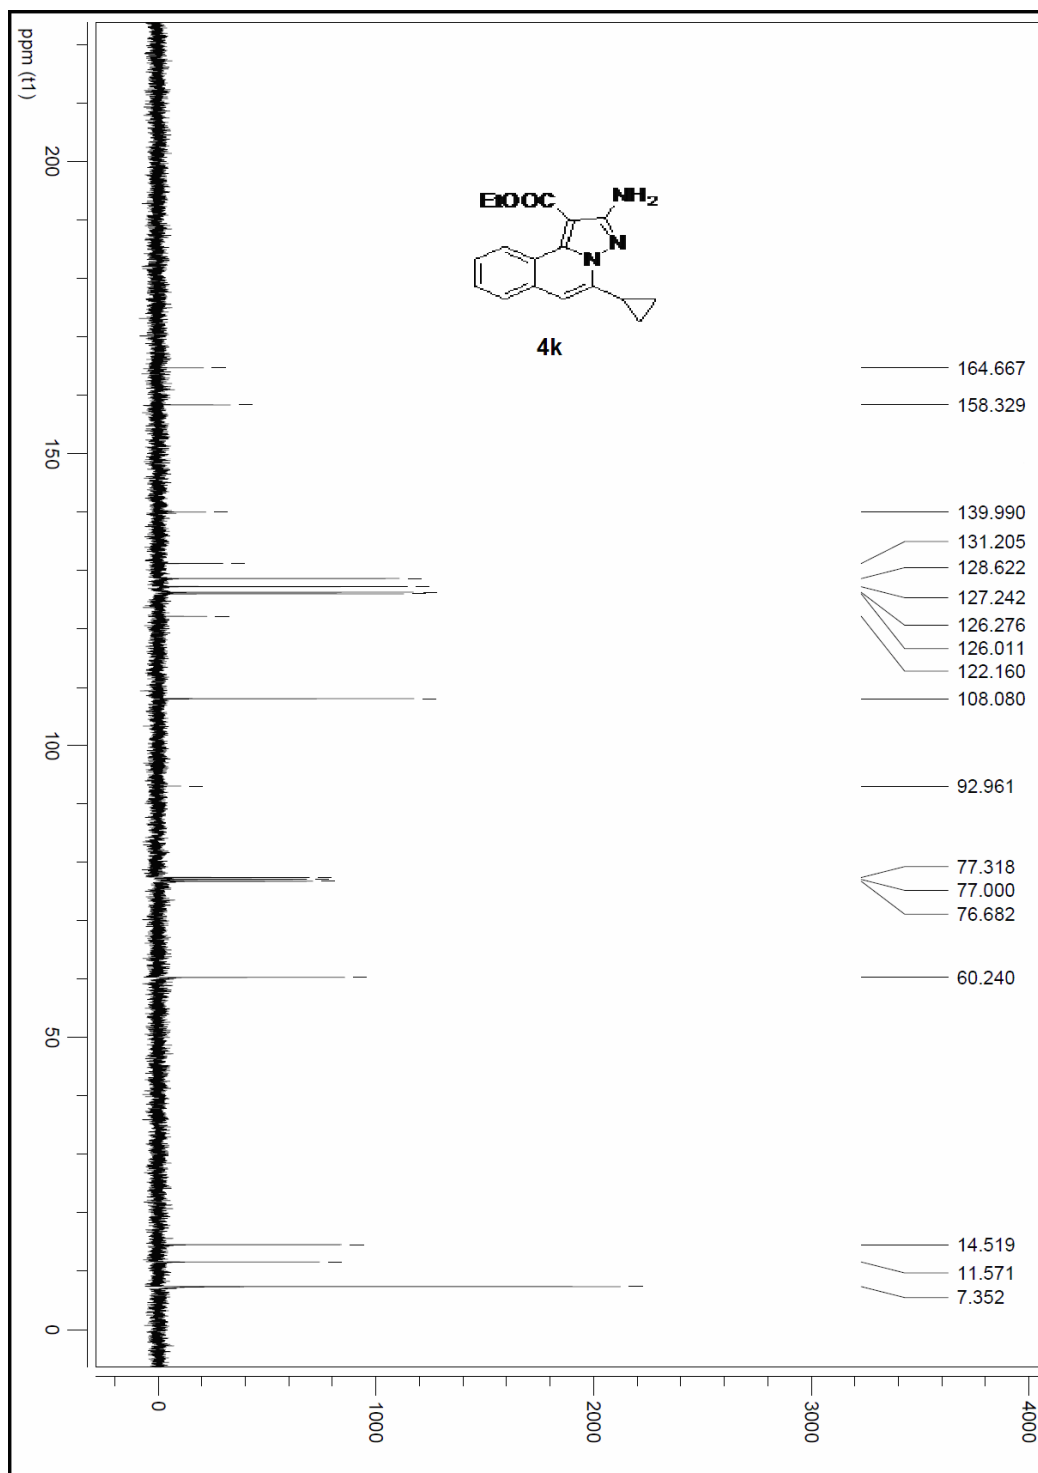

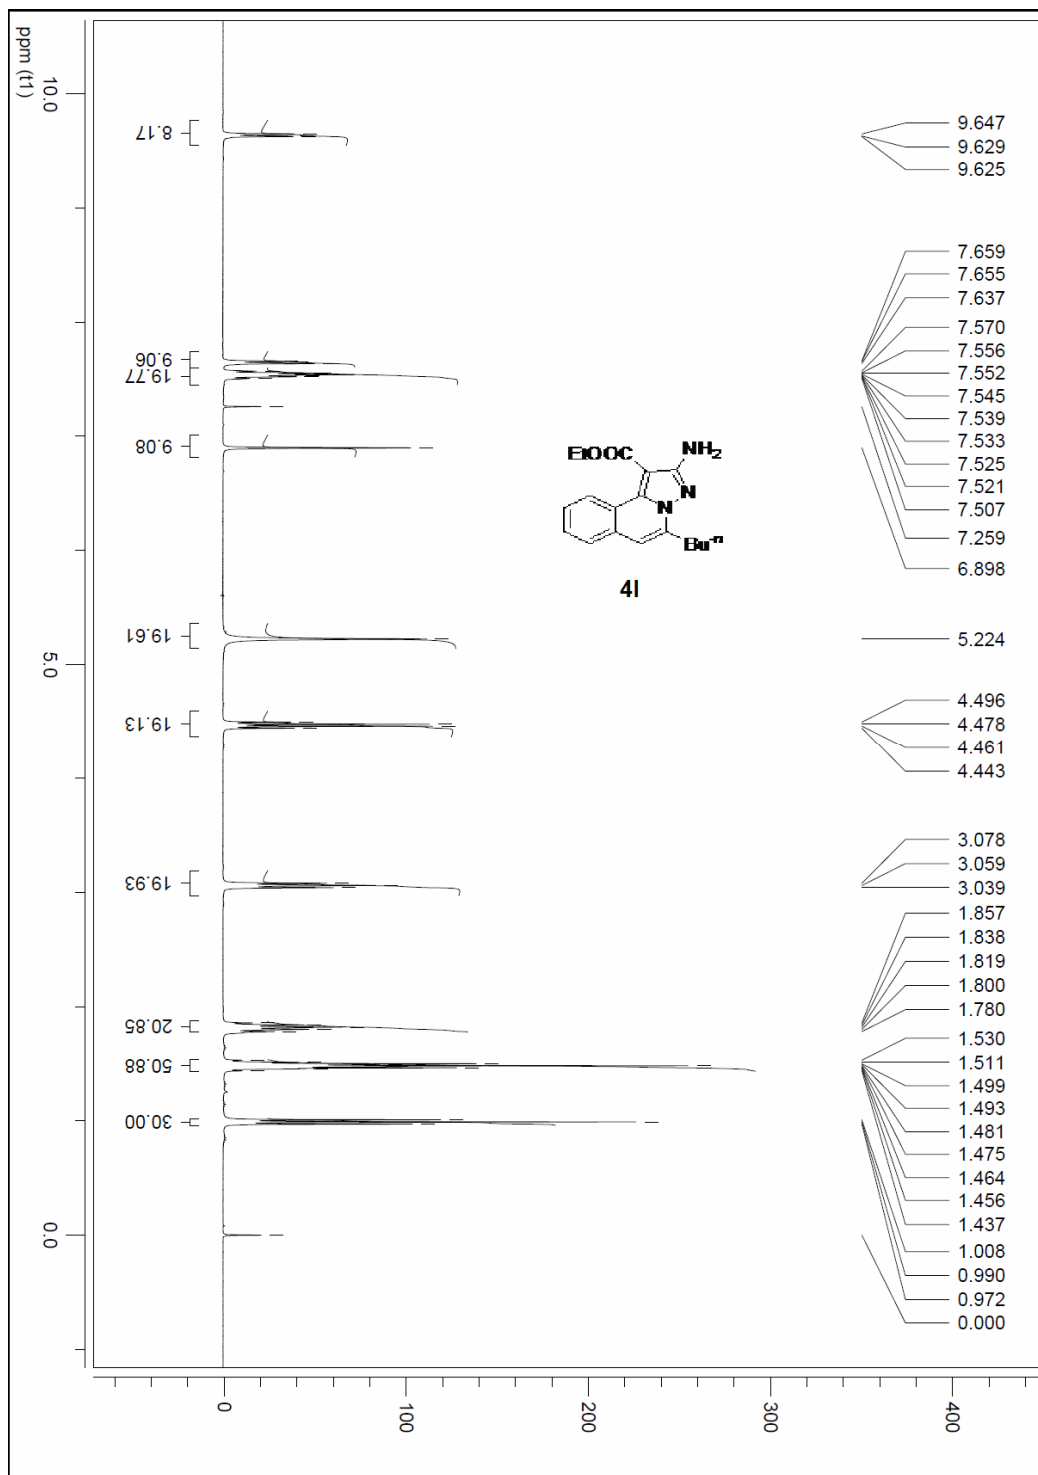



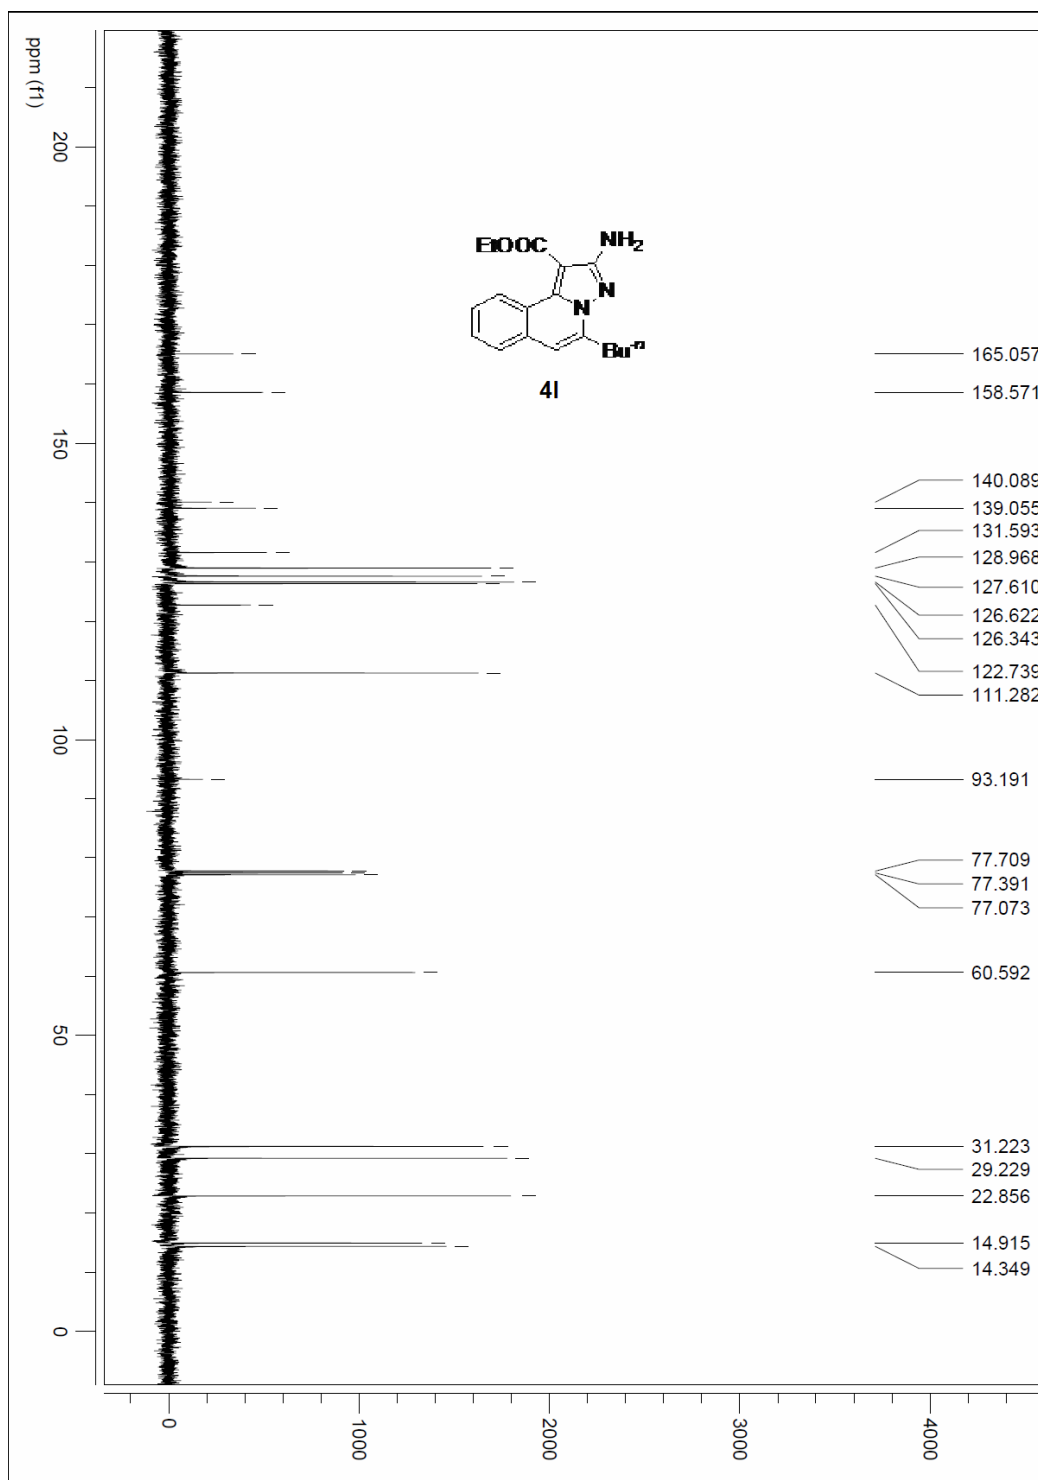

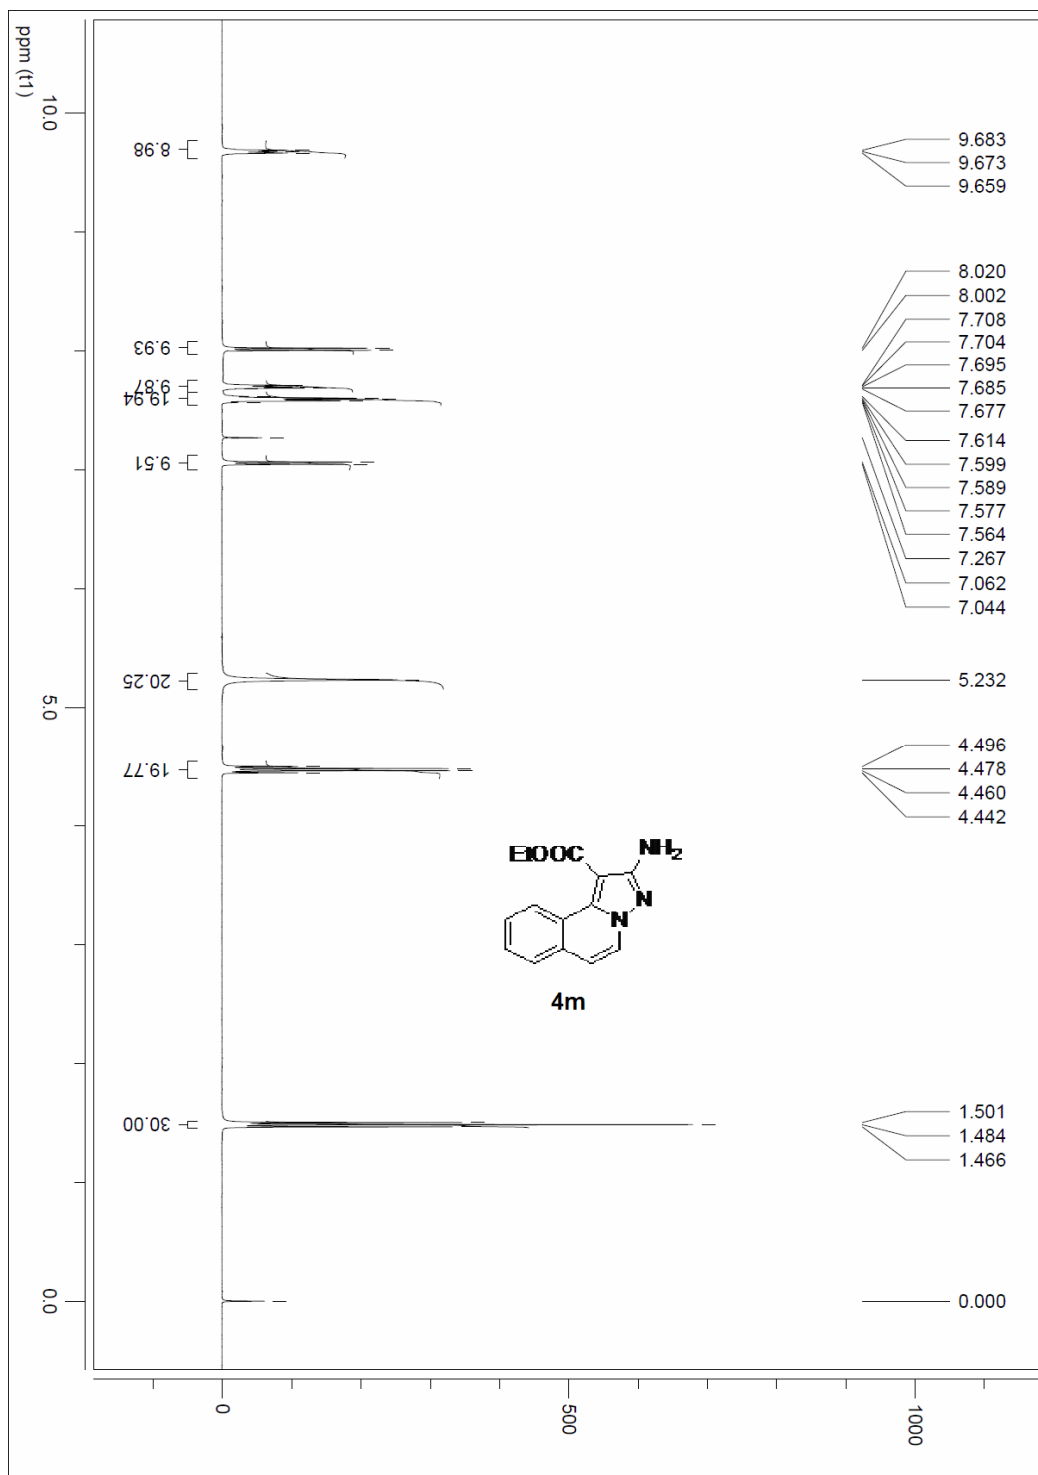

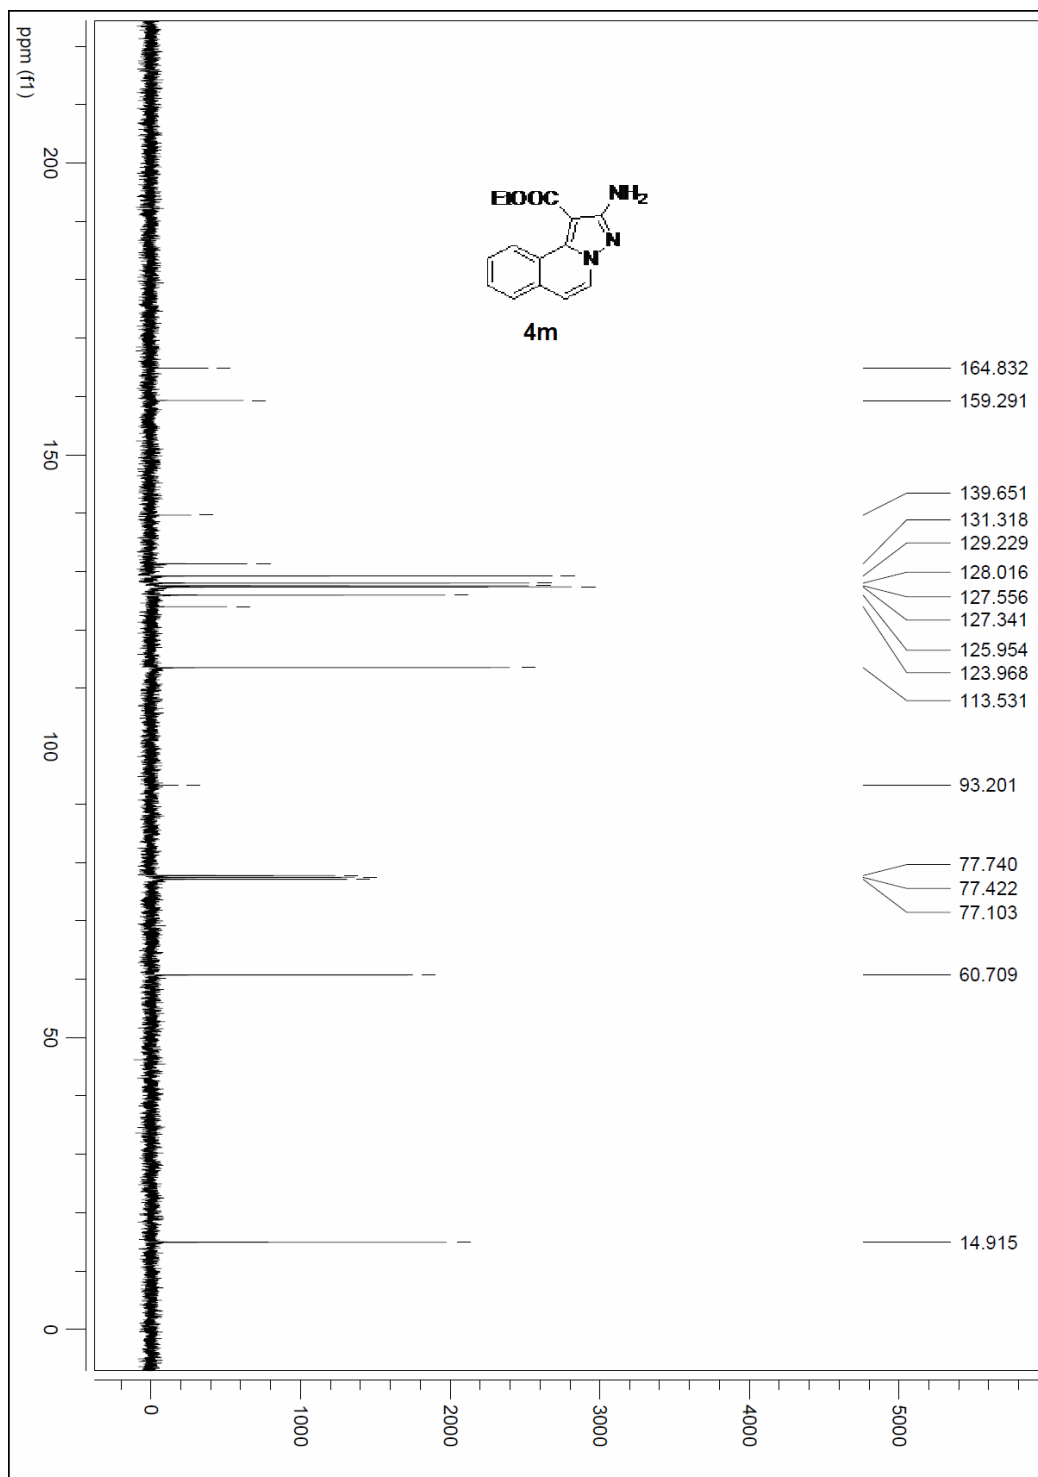

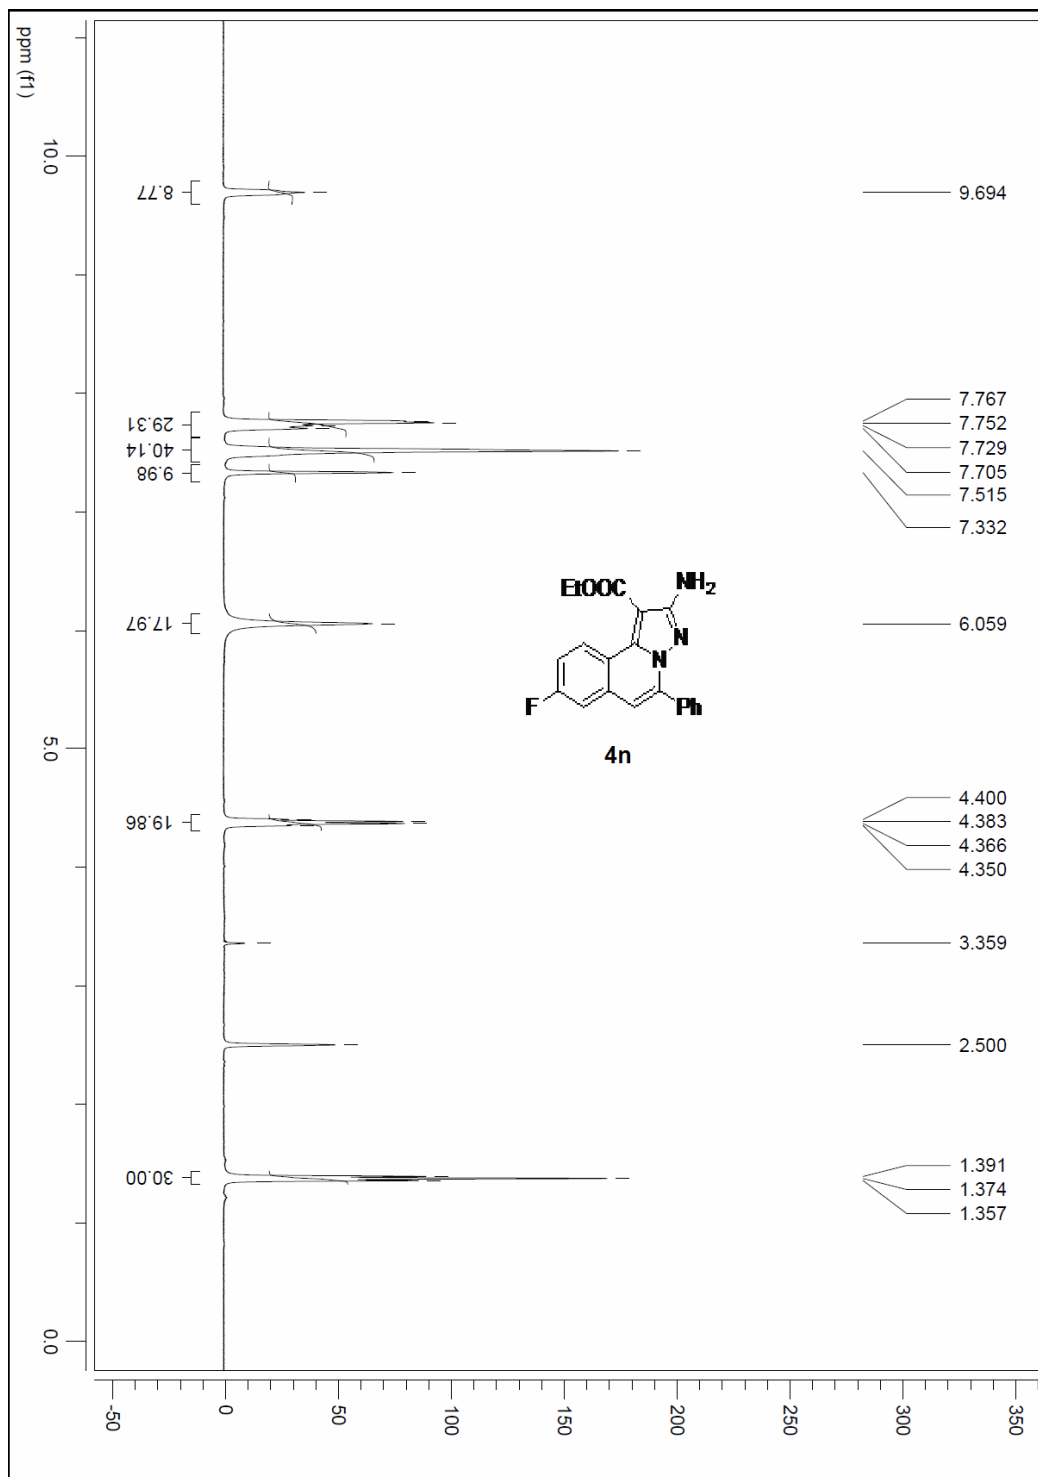

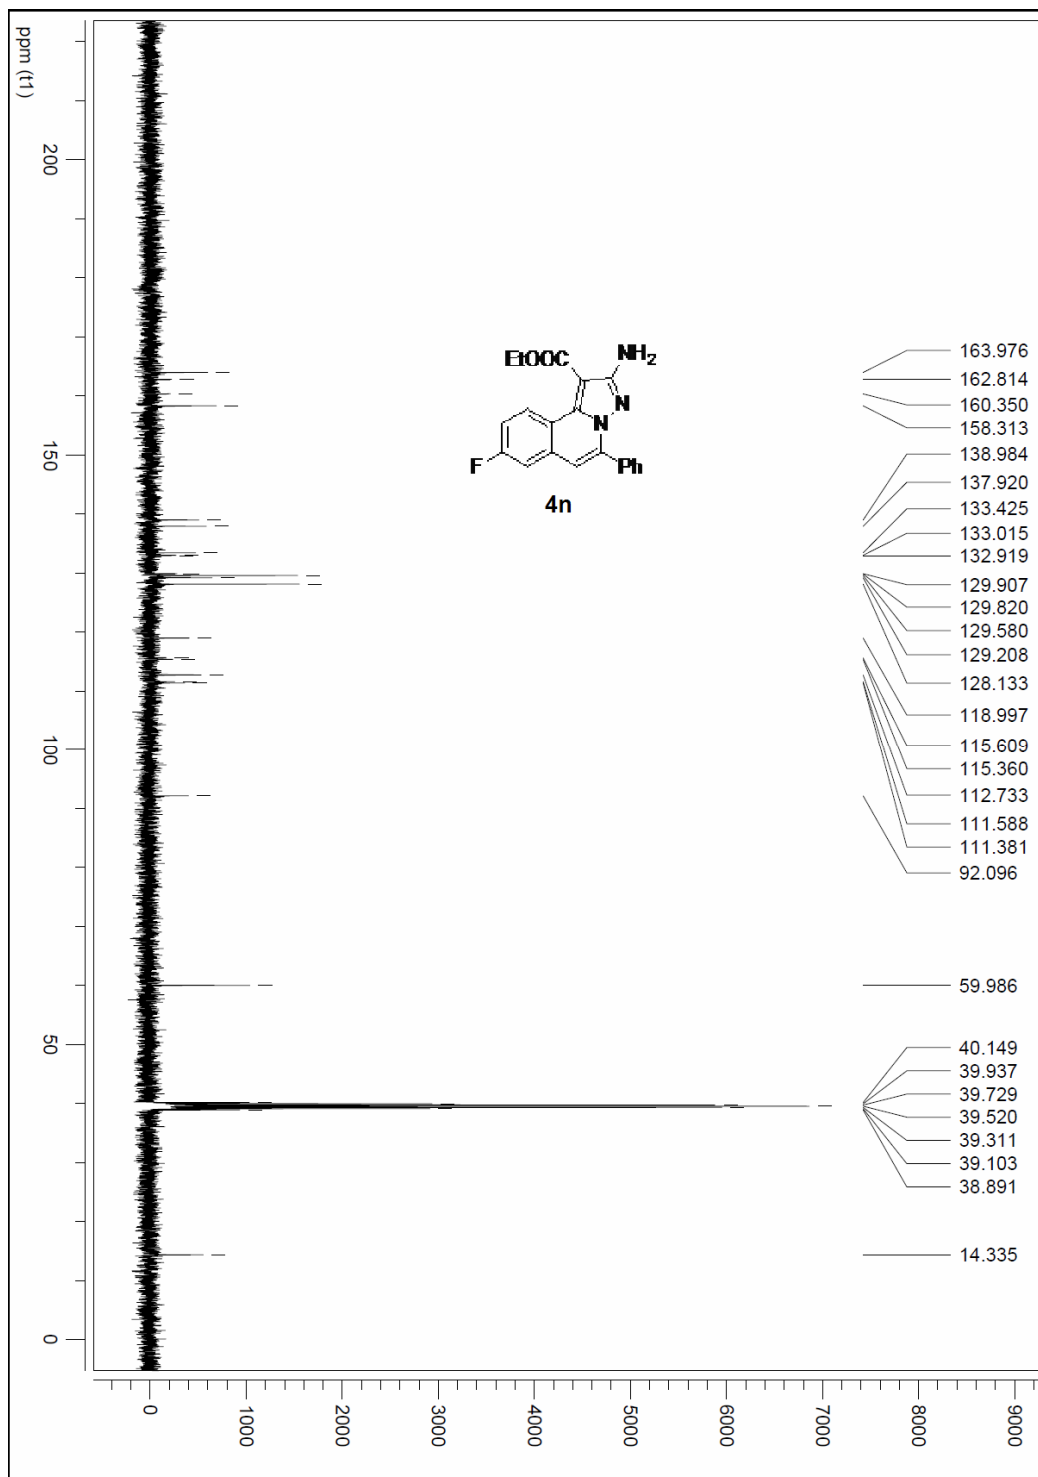

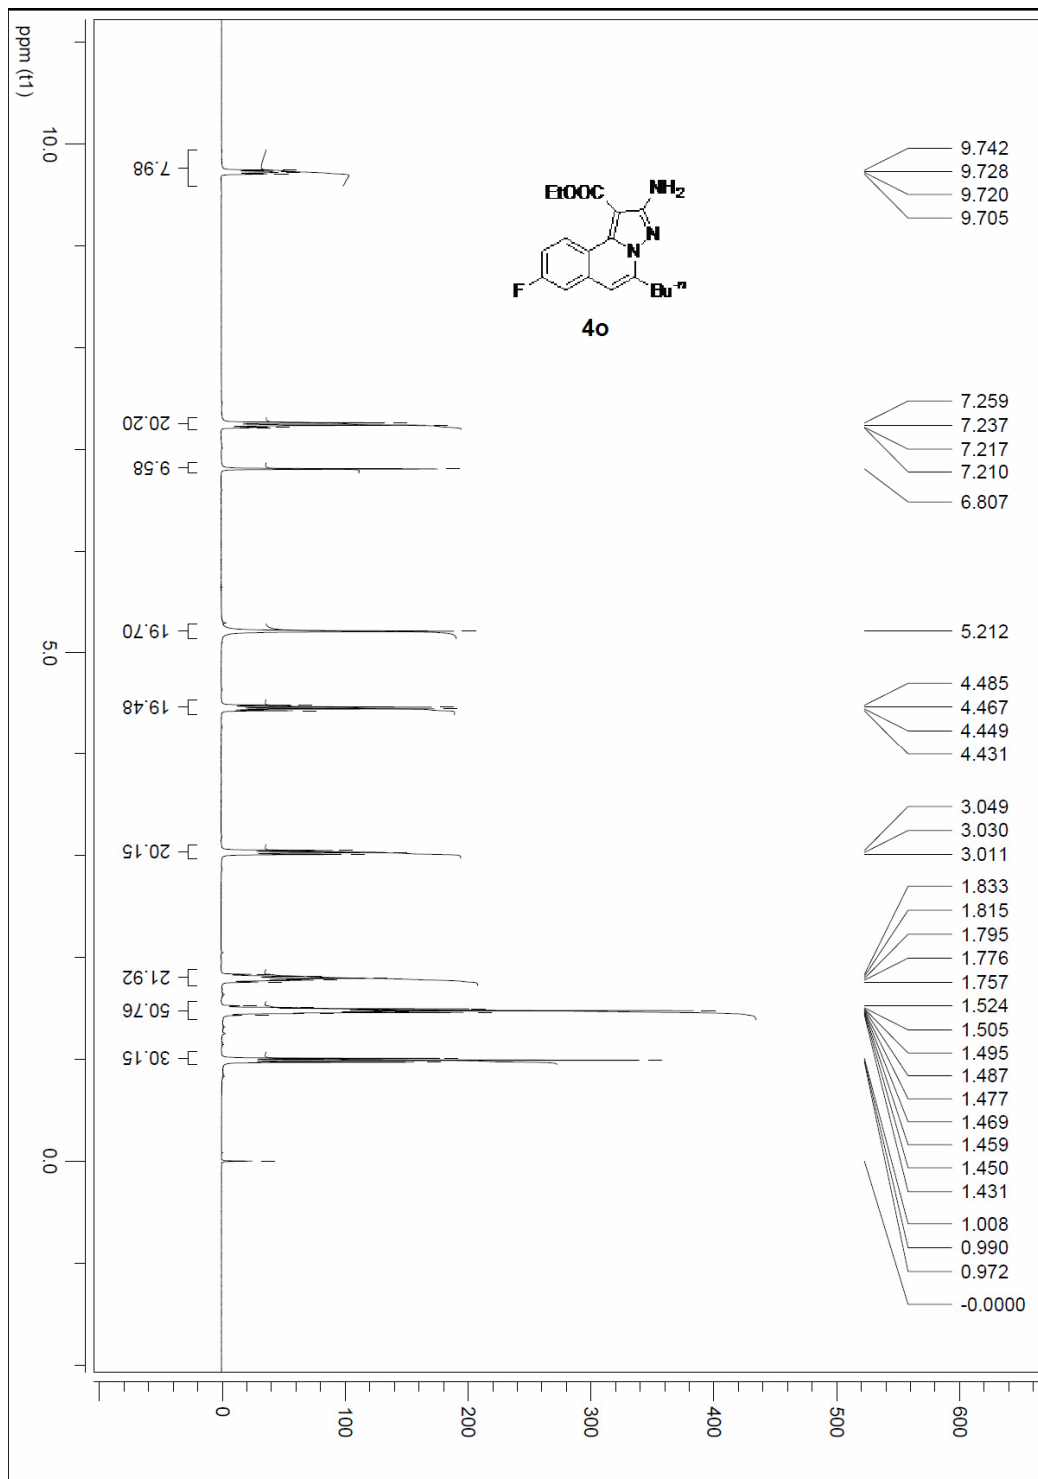

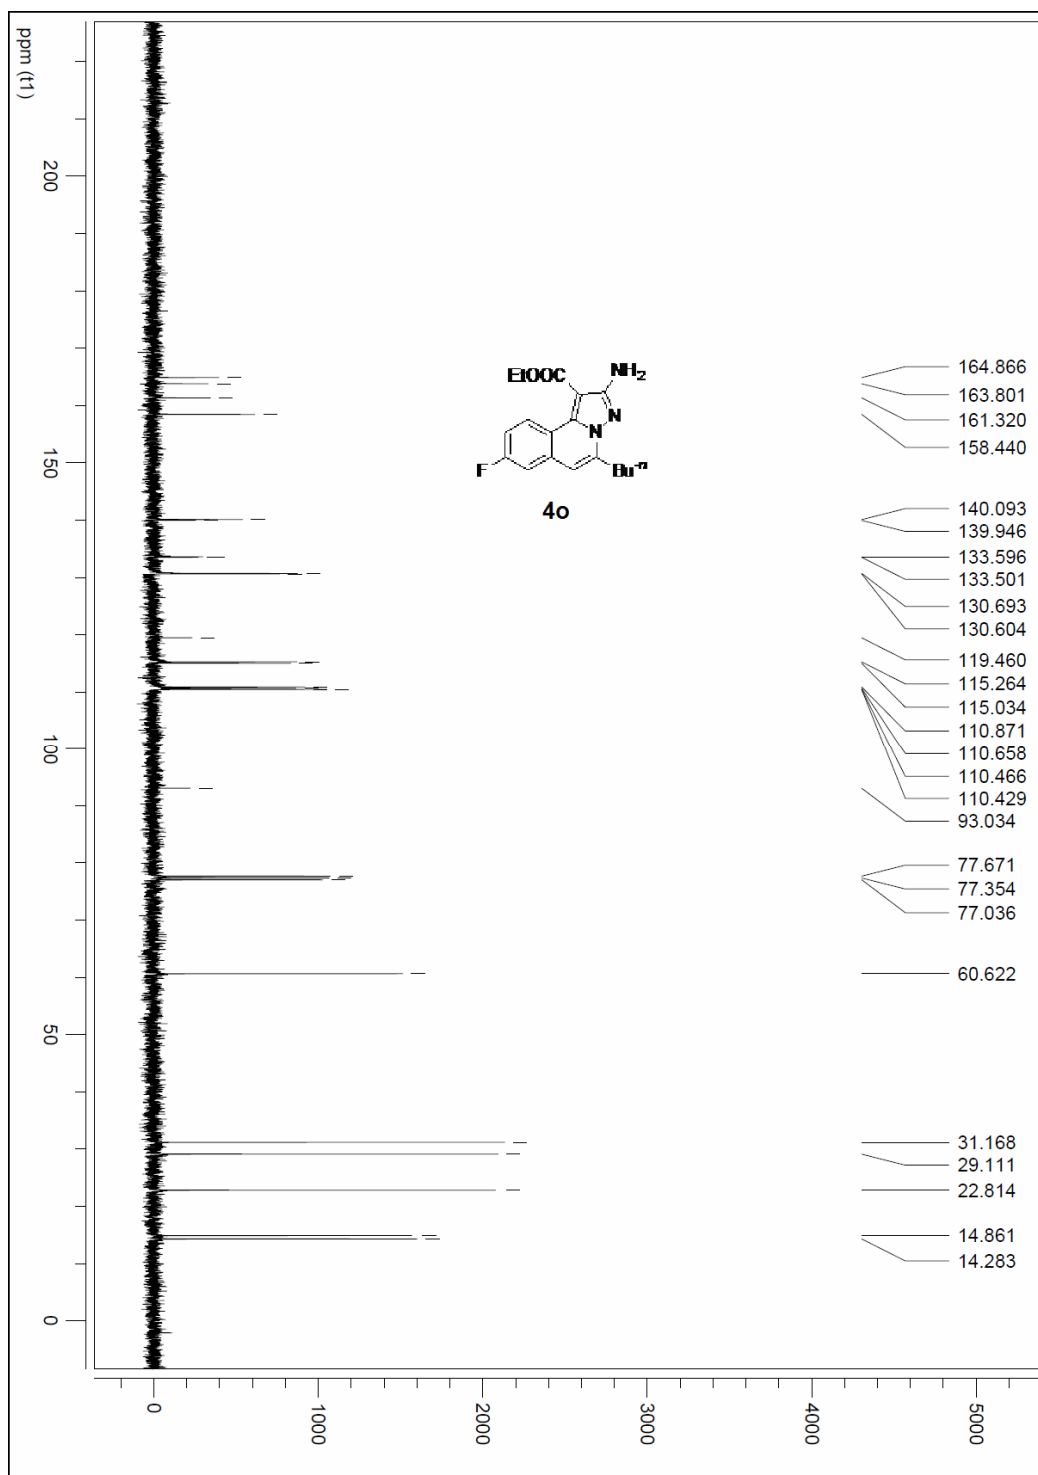

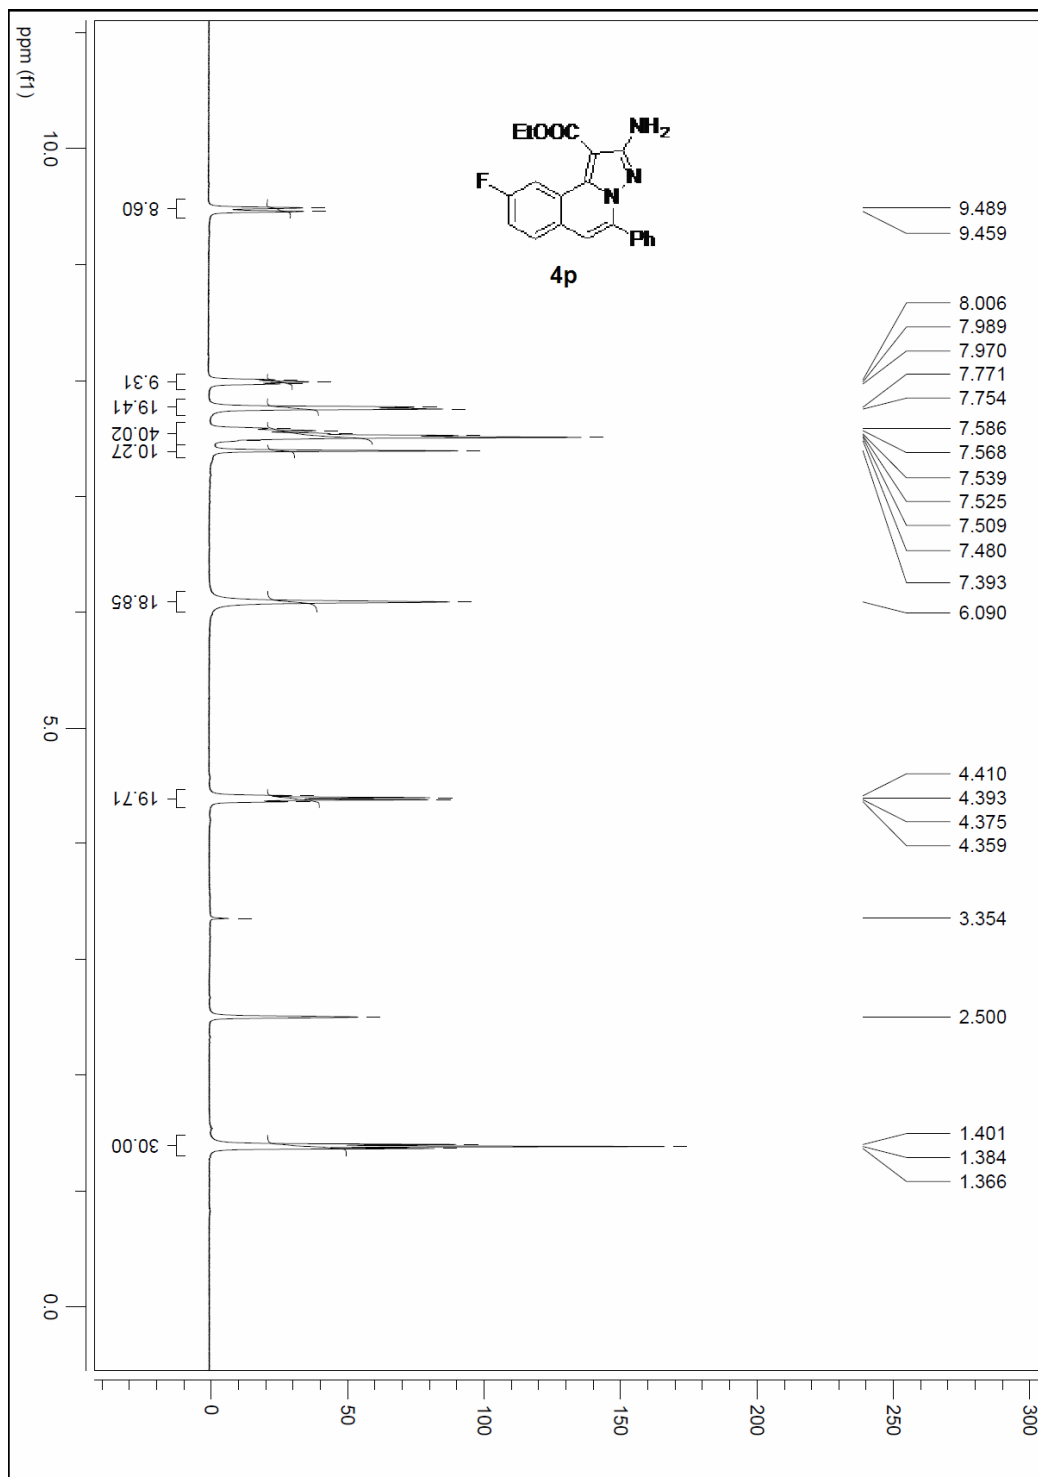



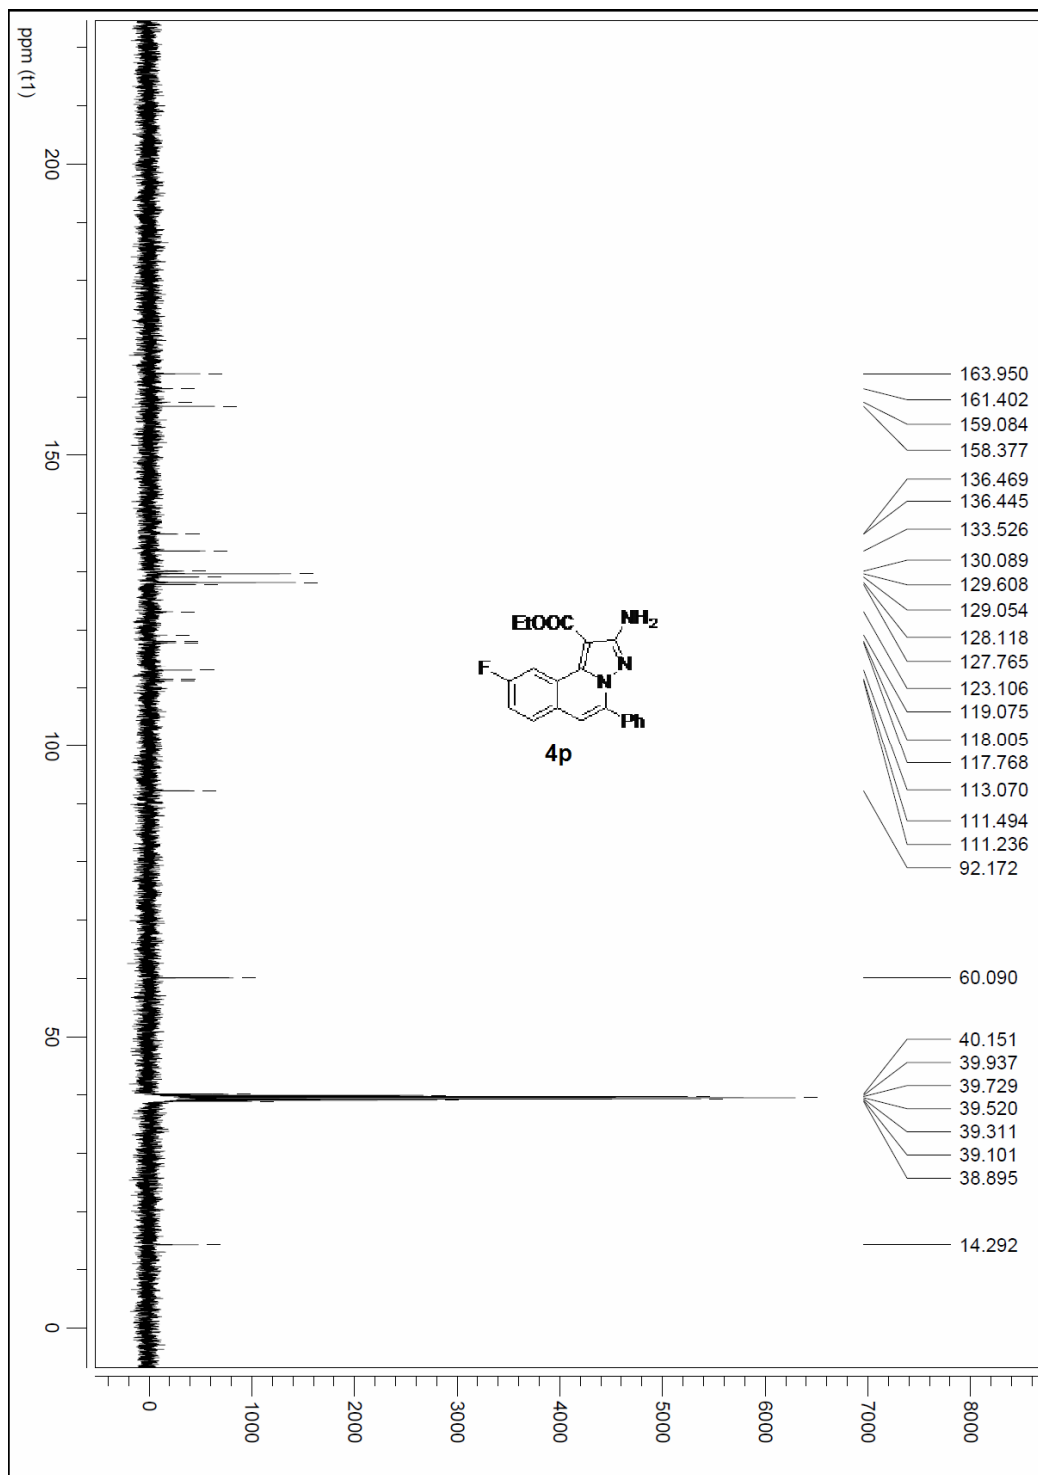

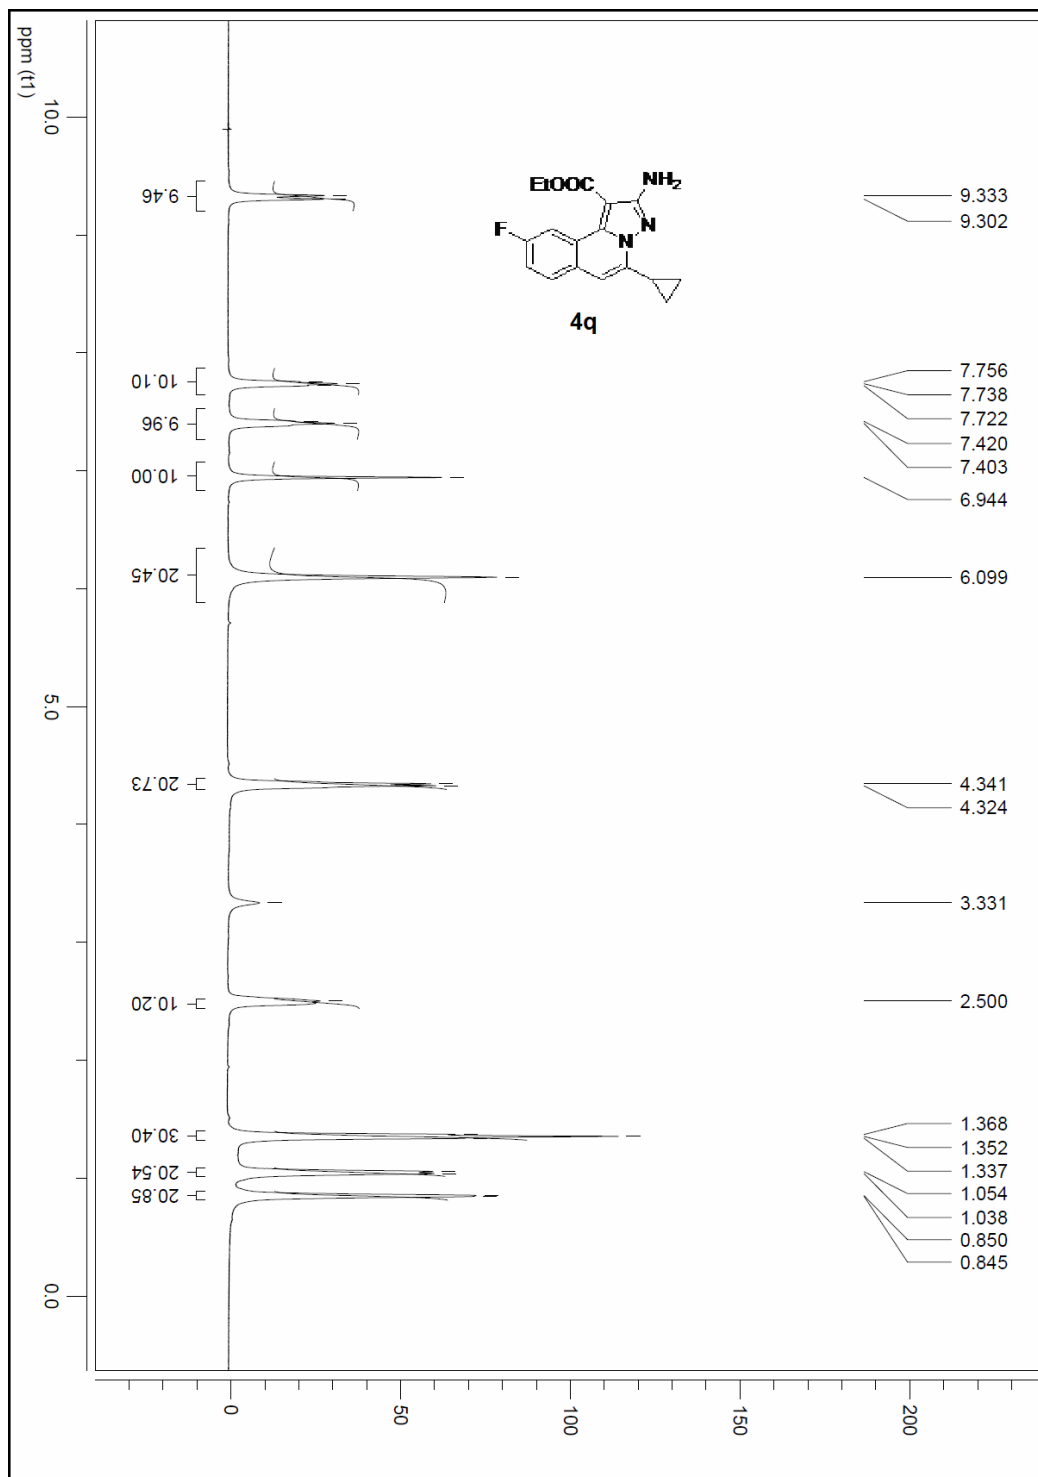

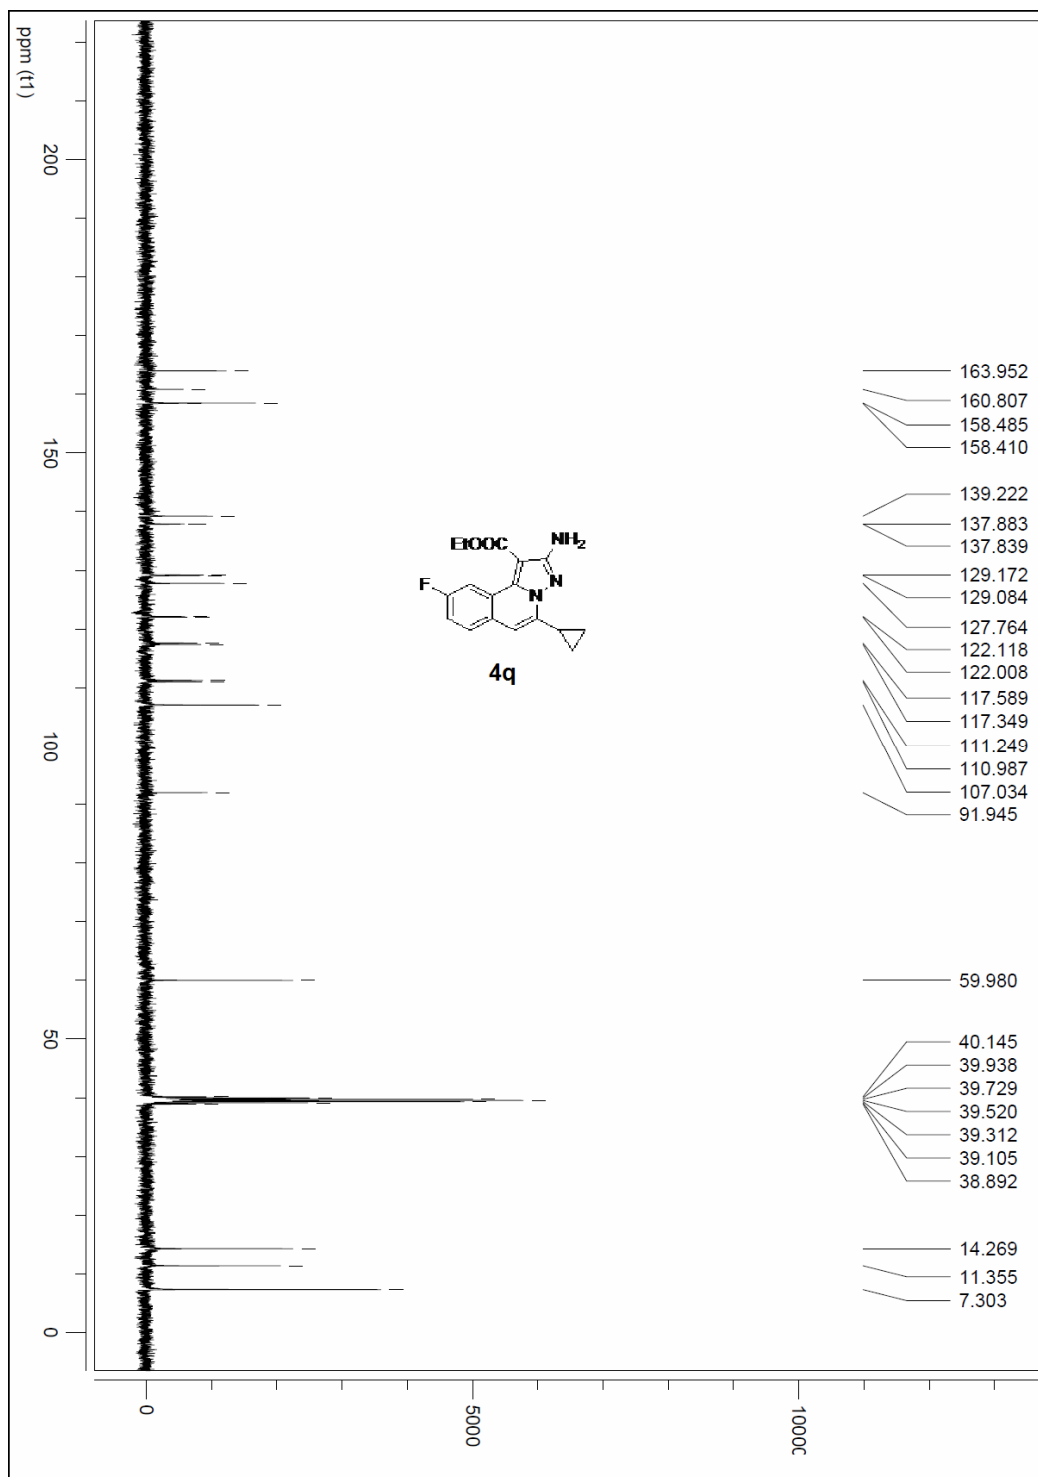

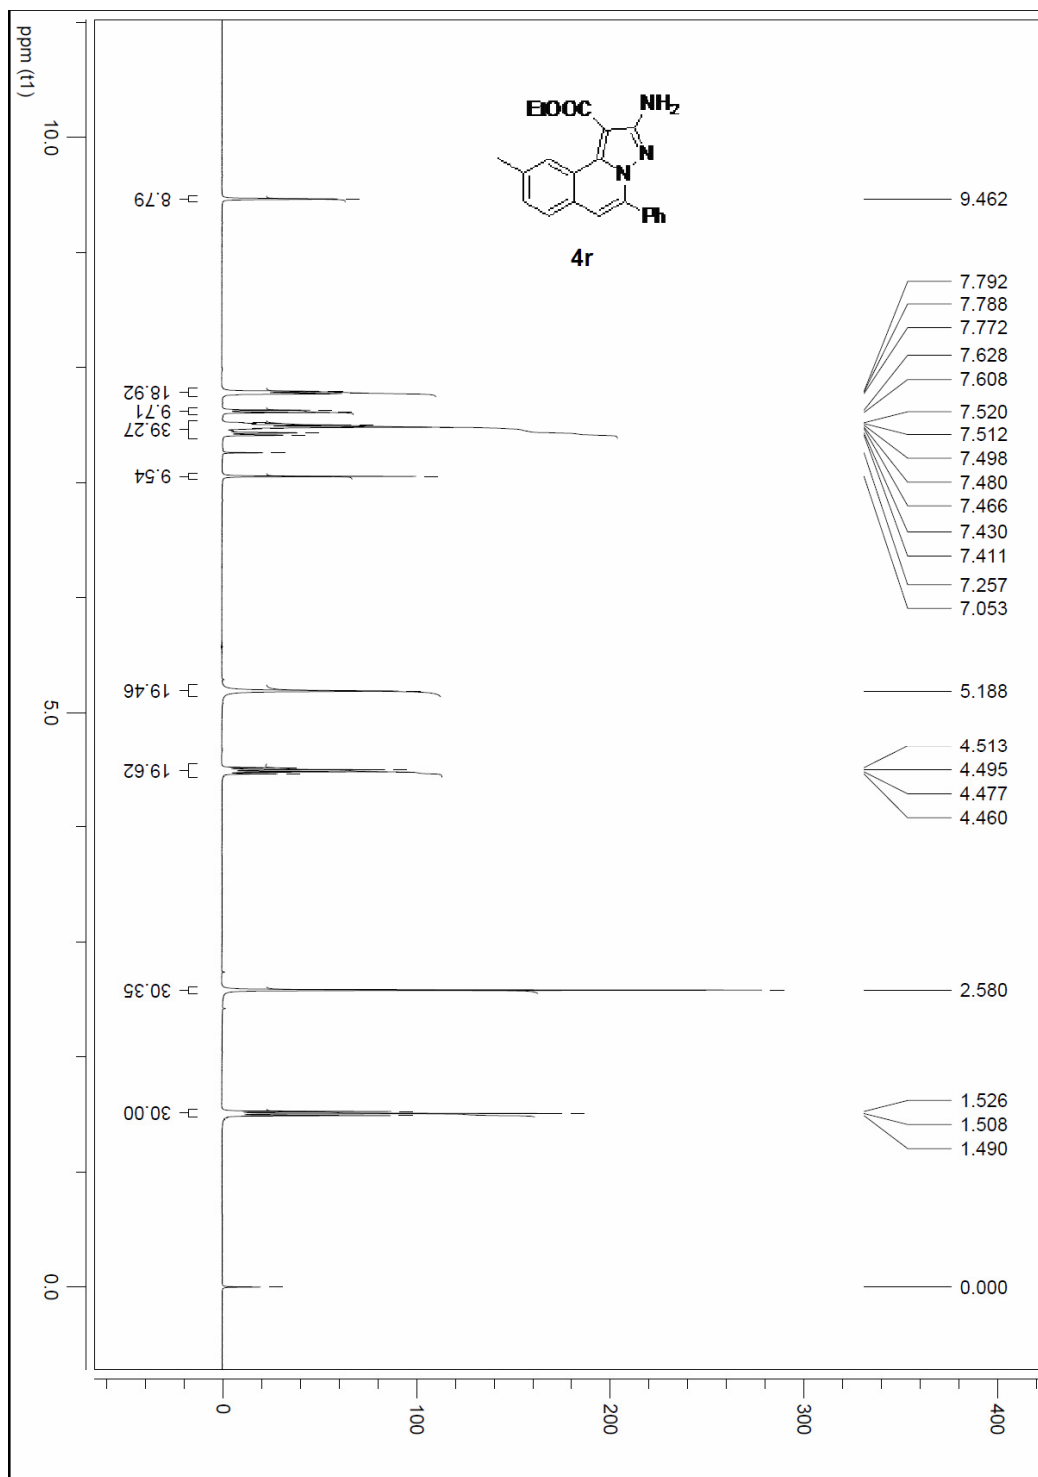

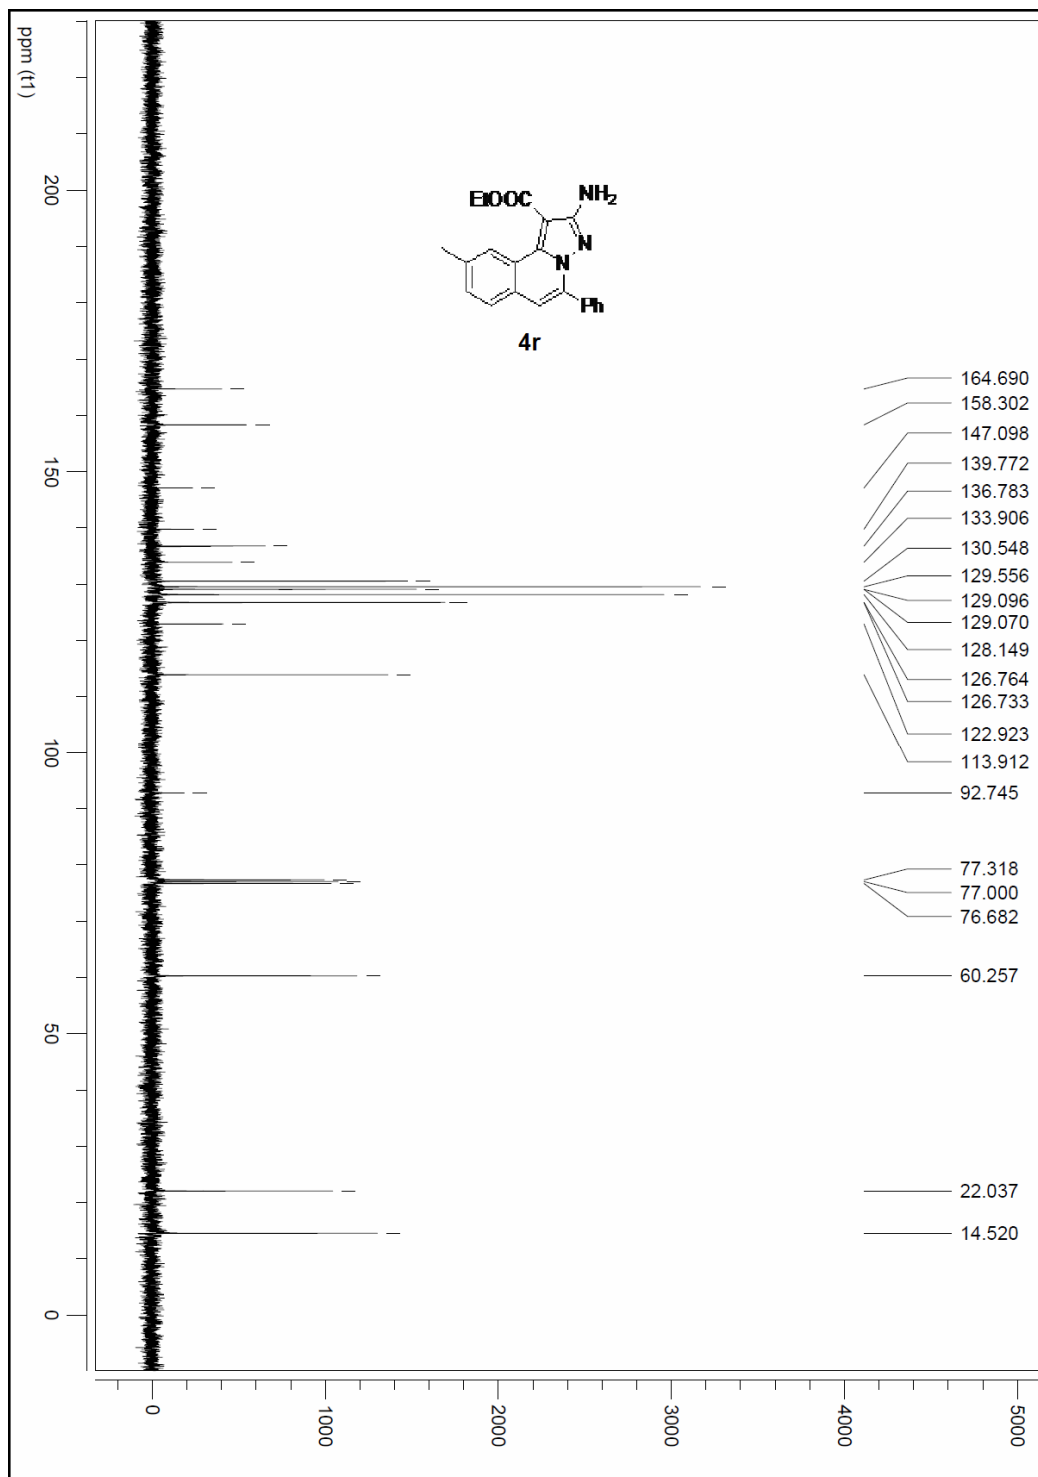

Supplement: c1ob05917c.pdf [file c1ob05917c.pdf]
